# Supplementary material for: Cardiovascular and neuropsychiatric safety of varenicline and bupropion compared with nicotine replacement therapy for smoking cessation: study protocol of a retrospective cohort study using the QResearch general practice database
Source: HighWire-hosted journal article supplement (doi:10.1136/bmjopen-2014-005281), 2014-08-01
Supplement: bmjopen-2014-005281supp.pdf [file bmjopen-2014-005281supp.pdf]

| Group Id | Group Name | ReadTerm | ReadDesc                                                     | Group Version | Date Of Version |
|----------|------------|----------|--------------------------------------------------------------|---------------|-----------------|
| 2493     | COPD       | H310     | Simple chronic bronchitis                                    | 4             | 5-7-2013 15:24  |
| 2493     | COPD       | H3100    | Chronic catarrhal bronchitis                                 | 4             | 5-7-2013 15:24  |
| 2493     | COPD       | H3101    | Smokers' cough                                               | 4             | 5-7-2013 15:24  |
| 2493     | COPD       | H310z    | Simple chronic bronchitis NOS                                | 4             | 5-7-2013 15:24  |
| 2493     | COPD       | H311     | Mucopurulent chronic bronchitis                              | 4             | 5-7-2013 15:24  |
| 2493     | COPD       | H311-99  | Mucopurulent chr. bronchitis                                 | 4             | 5-7-2013 15:24  |
| 2493     | COPD       | H3110    | Purulent chronic bronchitis                                  | 4             | 5-7-2013 15:24  |
| 2493     | COPD       | H3111    | Fetid chronic bronchitis                                     | 4             | 5-7-2013 15:24  |
| 2493     | COPD       | H311z    | Mucopurulent chronic bronchitis NOS                          | 4             | 5-7-2013 15:24  |
| 2493     | COPD       | H312     | Obstructive chronic bronchitis                               | 4             | 5-7-2013 15:24  |
| 2493     | COPD       | H3120    | Chronic asthmatic bronchitis                                 | 4             | 5-7-2013 15:24  |
| 2493     | COPD       | H3120-1  | Chronic wheezy bronchitis                                    | 4             | 5-7-2013 15:24  |
| 2493     | COPD       | H3121    | Emphysematous bronchitis                                     | 4             | 5-7-2013 15:24  |
| 2493     | COPD       | H3122    | Acute exacerbation of chronic obstructive airways disease    | 4             | 5-7-2013 15:24  |
| 2493     | COPD       | H3123    | Bronchiolitis obliterans                                     | 4             | 5-7-2013 15:24  |
| 2493     | COPD       | H312z    | Obstructive chronic bronchitis NOS                           | 4             | 5-7-2013 15:24  |
| 2493     | COPD       | H313     | Mixed simple and mucopurulent chronic bronchitis             | 4             | 5-7-2013 15:24  |
| 2493     | COPD       | H31y     | Other chronic bronchitis                                     | 4             | 5-7-2013 15:24  |
| 2493     | COPD       | H31y0    | Chronic tracheitis                                           | 4             | 5-7-2013 15:24  |
| 2493     | COPD       | H31y1    | Chronic tracheobronchitis                                    | 4             | 5-7-2013 15:24  |
| 2493     | COPD       | H31yz    | Other chronic bronchitis NOS                                 | 4             | 5-7-2013 15:24  |
| 2493     | COPD       | H31z     | Chronic bronchitis NOS                                       | 4             | 5-7-2013 15:24  |
| 2493     | COPD       | H320     | Chronic bullous emphysema                                    | 4             | 5-7-2013 15:24  |
| 2493     | COPD       | H3200    | Segmental bullous emphysema                                  | 4             | 5-7-2013 15:24  |
| 2493     | COPD       | H3201    | Zonal bullous emphysema                                      | 4             | 5-7-2013 15:24  |
| 2493     | COPD       | H3202    | Giant bullous emphysema                                      | 4             | 5-7-2013 15:24  |
| 2493     | COPD       | H3203    | Bullous emphysema with collapse                              | 4             | 5-7-2013 15:24  |
| 2493     | COPD       | H3203-1  | Tension pneumatocele                                         | 4             | 5-7-2013 15:24  |
| 2493     | COPD       | H320z    | Chronic bullous emphysema NOS                                | 4             | 5-7-2013 15:24  |
| 2493     | COPD       | H321     | Panlobular emphysema                                         | 4             | 5-7-2013 15:24  |
| 2493     | COPD       | H322     | Centrilobular emphysema                                      | 4             | 5-7-2013 15:24  |
| 2493     | COPD       | H32y     | Other emphysema                                              | 4             | 5-7-2013 15:24  |
| 2493     | COPD       | H32y0    | Acute vesicular emphysema                                    | 4             | 5-7-2013 15:24  |
| 2493     | COPD       | H32y1    | Atrophic (senile) emphysema                                  | 4             | 5-7-2013 15:24  |
| 2493     | COPD       | H32y1-1  | Acute interstitial emphysema                                 | 4             | 5-7-2013 15:24  |
| 2493     | COPD       | H32y2    | MacLeod's unilateral emphysema                               | 4             | 5-7-2013 15:24  |
| 2493     | COPD       | H32yz    | Other emphysema NOS                                          | 4             | 5-7-2013 15:24  |
| 2493     | COPD       | H32yz-1  | Sawyer - Jones syndrome                                      | 4             | 5-7-2013 15:24  |
| 2493     | COPD       | H32z     | Emphysema NOS                                                | 4             | 5-7-2013 15:24  |
| 2493     | COPD       | H36      | Mild chronic obstructive pulmonary disease                   | 4             | 5-7-2013 15:24  |
| 2493     | COPD       | H37      | Moderate chronic obstructive pulmonary disease               | 4             | 5-7-2013 15:24  |
| 2493     | COPD       | H38      | Severe chronic obstructive pulmonary disease                 | 4             | 5-7-2013 15:24  |
| 2493     | COPD       | H39      | Very severe chronic obstructive pulmonary disease            | 4             | 5-7-2013 15:24  |
| 2493     | COPD       | H3A      | End stage chronic obstructive airways disease                | 4             | 5-7-2013 15:24  |
| 2493     | COPD       | H3y      | Other specified chronic obstructive airways disease          | 4             | 5-7-2013 15:24  |
| 2493     | COPD       | H3y-1    | Other specified chronic obstructive pulmonary disease        | 4             | 5-7-2013 15:24  |
| 2493     | COPD       | H3y0     | Chronic obstruct pulmonary dis with acute lower resp infectn | 4             | 5-7-2013 15:24  |
| 2493     | COPD       | H3y1     | Chron obstruct pulmonary dis with acute exacerbation, unspec | 4             | 5-7-2013 15:24  |
| 2493     | COPD       | H3z      | Chronic obstructive airways disease NOS                      | 4             | 5-7-2013 15:24  |
| 2493     | COPD       | H3z-1    | Chronic obstructive pulmonary disease NOS                    | 4             | 5-7-2013 15:24  |
| 2493     | COPD       | H3z-98   | Chr. airway obstruction NOS                                  | 4             | 5-7-2013 15:24  |
| 2493     | COPD       | H3z-99   | Chronic obst. pulm. dis. NOS                                 | 4             | 5-7-2013 15:24  |

| Group Id | Group Name    | ReadTerm | ReadDesc                                        | Group Version | Date Of Version |
|----------|---------------|----------|-------------------------------------------------|---------------|-----------------|
| 2561     | Lung function | 337      | Lung function testing                           | 1             | 17-7-2013 11:45 |
| 2561     | Lung function | 337-1    | Lung function tests                             | 1             | 17-7-2013 11:45 |
| 2561     | Lung function | 3371     | Lung function testing done                      | 1             | 17-7-2013 11:45 |
| 2561     | Lung function | 3373     | Lung function testing normal                    | 1             | 17-7-2013 11:45 |
| 2561     | Lung function | 3374     | Lung function testing abnormal                  | 1             | 17-7-2013 11:45 |
| 2561     | Lung function | 3375     | Lung function mildly obstruct.                  | 1             | 17-7-2013 11:45 |
| 2561     | Lung function | 3376     | Lung function signific. obstr.                  | 1             | 17-7-2013 11:45 |
| 2561     | Lung function | 3377     | Lung function restrictive                       | 1             | 17-7-2013 11:45 |
| 2561     | Lung function | 337C-1   | Lung function obstructed                        | 1             | 17-7-2013 11:45 |
| 2561     | Lung function | 337Z     | Lung function test NOS                          | 1             | 17-7-2013 11:45 |
| 2561     | Lung function | 3396     | Forced vital capacity - FVC                     | 1             | 17-7-2013 11:45 |
| 2561     | Lung function | 33960    | FVC - forced vital capacity normal              | 1             | 17-7-2013 11:45 |
| 2561     | Lung function | 33961    | FVC - forced vital capacity abnormal            | 1             | 17-7-2013 11:45 |
| 2561     | Lung function | 33962    | Percentage of predicted forced vital capacity   | 1             | 17-7-2013 11:45 |
| 2561     | Lung function | 3397     | Forced expiratory volume - FEV                  | 1             | 17-7-2013 11:45 |
| 2561     | Lung function | 339a     | FEV1 before bronchodilation                     | 1             | 17-7-2013 11:45 |
| 2561     | Lung function | 339b     | FEV1 after bronchodilation                      | 1             | 17-7-2013 11:45 |
| 2561     | Lung function | 339e     | FEV1 pre steroids                               | 1             | 17-7-2013 11:45 |
| 2561     | Lung function | 339f     | FEV1 post steroids                              | 1             | 17-7-2013 11:45 |
| 2561     | Lung function | 339h     | FVC after bronchodilation                       | 1             | 17-7-2013 11:45 |
| 2561     | Lung function | 339h0    | FVC post bronchodilator percentage change       | 1             | 17-7-2013 11:45 |
| 2561     | Lung function | 339i     | FVC/Expected FVC percent                        | 1             | 17-7-2013 11:45 |
| 2561     | Lung function | 339P     | Expected FEV1                                   | 1             | 17-7-2013 11:45 |
| 2561     | Lung function | 339Q     | Expected FVC                                    | 1             | 17-7-2013 11:45 |
| 2561     | Lung function | 339S     | Percent predicted FEV1                          | 1             | 17-7-2013 11:45 |
| 2561     | Lung function | 339s     | Forced vital capacity before bronchodilation    | 1             | 17-7-2013 11:45 |
| 2561     | Lung function | 339S0    | Percentage predicted FEV1 after bronchodilation | 1             | 17-7-2013 11:45 |
| 2561     | Lung function | 5882     | Spirometry                                      | 1             | 17-7-2013 11:45 |
| 2561     | Lung function | 745C1    | Spirometry                                      | 1             | 17-7-2013 11:45 |
| 2561     | Lung function | 745D4    | Post bronchodilator spirometry                  | 1             | 17-7-2013 11:45 |

| Group Id | Group Name | ReadTerm | ReadDesc                          | Group Version | Date Of Version |
|----------|------------|----------|-----------------------------------|---------------|-----------------|
| 2562     | MRC        | 173H     | MRC Breathlessness Scale: grade 1 | 1             | 17-7-2013 11:48 |
| 2562     | MRC        | 173I     | MRC Breathlessness Scale: grade 2 | 1             | 17-7-2013 11:48 |
| 2562     | MRC        | 173J     | MRC Breathlessness Scale: grade 3 | 1             | 17-7-2013 11:48 |
| 2562     | MRC        | 173K     | MRC Breathlessness Scale: grade 4 | 1             | 17-7-2013 11:48 |
| 2562     | MRC        | 173L     | MRC Breathlessness Scale: grade 5 | 1             | 17-7-2013 11:48 |

| Group Id | Group Name              | ReadTerm | ReadDesc                                                     | Group Version | Date Of Version |
|----------|-------------------------|----------|--------------------------------------------------------------|---------------|-----------------|
| 2550     | Ischaemic heart disease | 322      | ECG: myocardial ischaemia                                    | 1             | 8-7-2013 17:31  |
| 2550     | Ischaemic heart disease | 3222     | ECG:shows myocardial ischaemia                               | 1             | 8-7-2013 17:31  |
| 2550     | Ischaemic heart disease | 322Z     | ECG: myocardial ischaemia NOS                                | 1             | 8-7-2013 17:31  |
| 2550     | Ischaemic heart disease | 323      | ECG: myocardial infarction                                   | 1             | 8-7-2013 17:31  |
| 2550     | Ischaemic heart disease | 3233     | ECG: antero-septal infarct.                                  | 1             | 8-7-2013 17:31  |
| 2550     | Ischaemic heart disease | 3234     | ECG:posterior/inferior infarct                               | 1             | 8-7-2013 17:31  |
| 2550     | Ischaemic heart disease | 3235     | ECG: subendocardial infarct                                  | 1             | 8-7-2013 17:31  |
| 2550     | Ischaemic heart disease | 3236     | ECG: lateral infarction                                      | 1             | 8-7-2013 17:31  |
| 2550     | Ischaemic heart disease | 323Z     | ECG: myocardial infarct NOS                                  | 1             | 8-7-2013 17:31  |
| 2550     | Ischaemic heart disease | 662K     | Angina control                                               | 1             | 8-7-2013 17:31  |
| 2550     | Ischaemic heart disease | 662K0    | Angina control - good                                        | 1             | 8-7-2013 17:31  |
| 2550     | Ischaemic heart disease | 662K1    | Angina control - poor                                        | 1             | 8-7-2013 17:31  |
| 2550     | Ischaemic heart disease | 662K2    | Angina control - improving                                   | 1             | 8-7-2013 17:31  |
| 2550     | Ischaemic heart disease | 662K3    | Angina control - worsening                                   | 1             | 8-7-2013 17:31  |
| 2550     | Ischaemic heart disease | 662Kz    | Angina control NOS                                           | 1             | 8-7-2013 17:31  |
| 2550     | Ischaemic heart disease | 792      | Coronary artery operations                                   | 1             | 8-7-2013 17:31  |
| 2550     | Ischaemic heart disease | 792-1    | Coronary artery bypass graft operations                      | 1             | 8-7-2013 17:31  |
| 2550     | Ischaemic heart disease | 792-99   | Coronary artery operation NOS                                | 1             | 8-7-2013 17:31  |
| 2550     | Ischaemic heart disease | 7920     | Saphenous vein graft replacement of coronary artery          | 1             | 8-7-2013 17:31  |
| 2550     | Ischaemic heart disease | 7920-1   | Saphenous vein graft bypass of coronary artery               | 1             | 8-7-2013 17:31  |
| 2550     | Ischaemic heart disease | 7920-99  | Coronary artery venous graft                                 | 1             | 8-7-2013 17:31  |
| 2550     | Ischaemic heart disease | 79200    | Saphenous vein graft replacement of one coronary artery      | 1             | 8-7-2013 17:31  |
| 2550     | Ischaemic heart disease | 79201    | Saphenous vein graft replacement of two coronary arteries    | 1             | 8-7-2013 17:31  |
| 2550     | Ischaemic heart disease | 79202    | Saphenous vein graft replacement of three coronary arteries  | 1             | 8-7-2013 17:31  |
| 2550     | Ischaemic heart disease | 79203    | Saphenous vein graft replacement of four+ coronary arteries  | 1             | 8-7-2013 17:31  |
| 2550     | Ischaemic heart disease | 7920y    | Saphenous vein graft replacement of coronary artery OS       | 1             | 8-7-2013 17:31  |
| 2550     | Ischaemic heart disease | 7920z    | Saphenous vein graft replacement coronary artery NOS         | 1             | 8-7-2013 17:31  |
| 2550     | Ischaemic heart disease | 7921     | Other autograft replacement of coronary artery               | 1             | 8-7-2013 17:31  |
| 2550     | Ischaemic heart disease | 7921-1   | Other autograft bypass of coronary artery                    | 1             | 8-7-2013 17:31  |
| 2550     | Ischaemic heart disease | 79210    | Autograft replacement of one coronary artery NEC             | 1             | 8-7-2013 17:31  |
| 2550     | Ischaemic heart disease | 79211    | Autograft replacement of two coronary arteries NEC           | 1             | 8-7-2013 17:31  |
| 2550     | Ischaemic heart disease | 79212    | Autograft replacement of three coronary arteries NEC         | 1             | 8-7-2013 17:31  |
| 2550     | Ischaemic heart disease | 79213    | Autograft replacement of four of more coronary arteries NEC  | 1             | 8-7-2013 17:31  |
| 2550     | Ischaemic heart disease | 7921y    | Other autograft replacement of coronary artery OS            | 1             | 8-7-2013 17:31  |
| 2550     | Ischaemic heart disease | 7921z    | Other autograft replacement of coronary artery NOS           | 1             | 8-7-2013 17:31  |
| 2550     | Ischaemic heart disease | 7922     | Allograft replacement of coronary artery                     | 1             | 8-7-2013 17:31  |
| 2550     | Ischaemic heart disease | 7922-1   | Allograft bypass of coronary artery                          | 1             | 8-7-2013 17:31  |
| 2550     | Ischaemic heart disease | 79220    | Allograft replacement of one coronary artery                 | 1             | 8-7-2013 17:31  |
| 2550     | Ischaemic heart disease | 79221    | Allograft replacement of two coronary arteries               | 1             | 8-7-2013 17:31  |
| 2550     | Ischaemic heart disease | 79222    | Allograft replacement of three coronary arteries             | 1             | 8-7-2013 17:31  |
| 2550     | Ischaemic heart disease | 79223    | Allograft replacement of four or more coronary arteries      | 1             | 8-7-2013 17:31  |
| 2550     | Ischaemic heart disease | 7922y    | Other specified allograft replacement of coronary artery     | 1             | 8-7-2013 17:31  |
| 2550     | Ischaemic heart disease | 7922z    | Allograft replacement of coronary artery NOS                 | 1             | 8-7-2013 17:31  |
| 2550     | Ischaemic heart disease | 7923     | Prosthetic replacement of coronary artery                    | 1             | 8-7-2013 17:31  |
| 2550     | Ischaemic heart disease | 7923-1   | Prosthetic bypass of coronary artery                         | 1             | 8-7-2013 17:31  |
| 2550     | Ischaemic heart disease | 7923-99  | Insertn coronary artery stent                                | 1             | 8-7-2013 17:31  |
| 2550     | Ischaemic heart disease | 79230    | Prosthetic replacement of one coronary artery                | 1             | 8-7-2013 17:31  |
| 2550     | Ischaemic heart disease | 79231    | Prosthetic replacement of two coronary arteries              | 1             | 8-7-2013 17:31  |
| 2550     | Ischaemic heart disease | 79232    | Prosthetic replacement of three coronary arteries            | 1             | 8-7-2013 17:31  |
| 2550     | Ischaemic heart disease | 79233    | Prosthetic replacement of four or more coronary arteries     | 1             | 8-7-2013 17:31  |
| 2550     | Ischaemic heart disease | 7923y    | Other specified prosthetic replacement of coronary artery    | 1             | 8-7-2013 17:31  |
| 2550     | Ischaemic heart disease | 7923z    | Prosthetic replacement of coronary artery NOS                | 1             | 8-7-2013 17:31  |
| 2550     | Ischaemic heart disease | 7924     | Revision of bypass for coronary artery                       | 1             | 8-7-2013 17:31  |
| 2550     | Ischaemic heart disease | 7924-99  | Coronary A revasc. by-pass                                   | 1             | 8-7-2013 17:31  |
| 2550     | Ischaemic heart disease | 79240    | Revision of bypass for one coronary artery                   | 1             | 8-7-2013 17:31  |
| 2550     | Ischaemic heart disease | 79241    | Revision of bypass for two coronary arteries                 | 1             | 8-7-2013 17:31  |
| 2550     | Ischaemic heart disease | 79242    | Revision of bypass for three coronary arteries               | 1             | 8-7-2013 17:31  |
| 2550     | Ischaemic heart disease | 79243    | Revision of bypass for four or more coronary arteries        | 1             | 8-7-2013 17:31  |
| 2550     | Ischaemic heart disease | 79244    | Revision of connection of thoracic artery to coronary artery | 1             | 8-7-2013 17:31  |
| 2550     | Ischaemic heart disease | 79245    | Revision of implantation of thoracic artery into heart       | 1             | 8-7-2013 17:31  |
| 2550     | Ischaemic heart disease | 7924y    | Other specified revision of bypass for coronary artery       | 1             | 8-7-2013 17:31  |
| 2550     | Ischaemic heart disease | 7924z    | Revision of bypass for coronary artery NOS                   | 1             | 8-7-2013 17:31  |
| 2550     | Ischaemic heart disease | 7925     | Connection of mammary artery to coronary artery              | 1             | 8-7-2013 17:31  |
| 2550     | Ischaemic heart disease | 7925-1   | Creation of bypass from mammary artery to coronary artery    | 1             | 8-7-2013 17:31  |
| 2550     | Ischaemic heart disease | 7925-98  | Int.mammary coronary A by-pass                               | 1             | 8-7-2013 17:31  |
| 2550     | Ischaemic heart disease | 7925-99  | Heart: int. mammary A implant                                | 1             | 8-7-2013 17:31  |
| 2550     | Ischaemic heart disease | 79250    | Double anastomosis of mammary arteries to coronary arteries  | 1             | 8-7-2013 17:31  |
| 2550     | Ischaemic heart disease | 79250-1  | LIMA sequential anastomosis                                  | 1             | 8-7-2013 17:31  |
| 2550     | Ischaemic heart disease | 79250-2  | RIMA sequential anastomosis                                  | 1             | 8-7-2013 17:31  |
| 2550     | Ischaemic heart disease | 79251    | Double implant of mammary arteries into coronary arteries    | 1             | 8-7-2013 17:31  |
| 2550     | Ischaemic heart disease | 79252    | Single anast mammary art to left ant descend coronary art    | 1             | 8-7-2013 17:31  |
| 2550     | Ischaemic heart disease | 79253    | Single anastomosis of mammary artery to coronary artery NEC  | 1             | 8-7-2013 17:31  |
| 2550     | Ischaemic heart disease | 79253-1  | LIMA single anastomosis                                      | 1             | 8-7-2013 17:31  |
| 2550     | Ischaemic heart disease | 79253-2  | RIMA single anastomosis                                      | 1             | 8-7-2013 17:31  |
| 2550     | Ischaemic heart disease | 79254    | Single implantation of mammary artery into coronary artery   | 1             | 8-7-2013 17:31  |
| 2550     | Ischaemic heart disease | 7925y    | Connection of mammary artery to coronary artery OS           | 1             | 8-7-2013 17:31  |
| 2550     | Ischaemic heart disease | 7925z    | Connection of mammary artery to coronary artery NOS          | 1             | 8-7-2013 17:31  |

|      |                         |          |                                                               |   |                |
|------|-------------------------|----------|---------------------------------------------------------------|---|----------------|
| 2550 | Ischaemic heart disease | 7925z-99 | Int.mammary coronary A by-pass                                | 1 | 8-7-2013 17:31 |
| 2550 | Ischaemic heart disease | 7926     | Connection of other thoracic artery to coronary artery        | 1 | 8-7-2013 17:31 |
| 2550 | Ischaemic heart disease | 7926-99  | Heart: arterial implant                                       | 1 | 8-7-2013 17:31 |
| 2550 | Ischaemic heart disease | 79260    | Double anastom thoracic arteries to coronary arteries NEC     | 1 | 8-7-2013 17:31 |
| 2550 | Ischaemic heart disease | 79261    | Double implant thoracic arteries into coronary arteries NEC   | 1 | 8-7-2013 17:31 |
| 2550 | Ischaemic heart disease | 79262    | Single anastomosis of thoracic artery to coronary artery NEC  | 1 | 8-7-2013 17:31 |
| 2550 | Ischaemic heart disease | 79263    | Single implantation thoracic artery into coronary artery NEC  | 1 | 8-7-2013 17:31 |
| 2550 | Ischaemic heart disease | 7926y    | Connection of other thoracic artery to coronary artery OS     | 1 | 8-7-2013 17:31 |
| 2550 | Ischaemic heart disease | 7926y-99 | Heart: aortic branch implant                                  | 1 | 8-7-2013 17:31 |
| 2550 | Ischaemic heart disease | 7926z    | Connection of other thoracic artery to coronary artery NOS    | 1 | 8-7-2013 17:31 |
| 2550 | Ischaemic heart disease | 7926z-99 | Heart: arterial implant NOS                                   | 1 | 8-7-2013 17:31 |
| 2550 | Ischaemic heart disease | 7927     | Other open operations on coronary artery                      | 1 | 8-7-2013 17:31 |
| 2550 | Ischaemic heart disease | 7927-99  | Coronary A by-pass anastam NOS                                | 1 | 8-7-2013 17:31 |
| 2550 | Ischaemic heart disease | 79270    | Repair of arteriovenous fistula of coronary artery            | 1 | 8-7-2013 17:31 |
| 2550 | Ischaemic heart disease | 79270-99 | Coronary A-V fistula ligation                                 | 1 | 8-7-2013 17:31 |
| 2550 | Ischaemic heart disease | 79271    | Repair of aneurysm of coronary artery                         | 1 | 8-7-2013 17:31 |
| 2550 | Ischaemic heart disease | 79272    | Transection of muscle bridge of coronary artery               | 1 | 8-7-2013 17:31 |
| 2550 | Ischaemic heart disease | 79273    | Transposition of coronary artery NEC                          | 1 | 8-7-2013 17:31 |
| 2550 | Ischaemic heart disease | 79274    | Exploration of coronary artery                                | 1 | 8-7-2013 17:31 |
| 2550 | Ischaemic heart disease | 79275    | Open angioplasty of coronary artery                           | 1 | 8-7-2013 17:31 |
| 2550 | Ischaemic heart disease | 79275-99 | Angioplasty of coronary artery                                | 1 | 8-7-2013 17:31 |
| 2550 | Ischaemic heart disease | 7927y    | Other specified other open operation on coronary artery       | 1 | 8-7-2013 17:31 |
| 2550 | Ischaemic heart disease | 7927z    | Other open operation on coronary artery NOS                   | 1 | 8-7-2013 17:31 |
| 2550 | Ischaemic heart disease | 7928     | Transluminal balloon angioplasty of coronary artery           | 1 | 8-7-2013 17:31 |
| 2550 | Ischaemic heart disease | 7928-1   | Percutaneous balloon coronary angioplasty                     | 1 | 8-7-2013 17:31 |
| 2550 | Ischaemic heart disease | 7928-99  | Coronary Angioplasty                                          | 1 | 8-7-2013 17:31 |
| 2550 | Ischaemic heart disease | 79280    | Percut transluminal balloon angioplasty one coronary artery   | 1 | 8-7-2013 17:31 |
| 2550 | Ischaemic heart disease | 79280-99 | Percut angiopl coronary artery                                | 1 | 8-7-2013 17:31 |
| 2550 | Ischaemic heart disease | 79281    | Percut translum balloon angioplasty mult coronary arteries    | 1 | 8-7-2013 17:31 |
| 2550 | Ischaemic heart disease | 79282    | Percut translum balloon angioplasty bypass graft coronary a   | 1 | 8-7-2013 17:31 |
| 2550 | Ischaemic heart disease | 79283    | Percut translum cutting balloon angioplasty coronary artery   | 1 | 8-7-2013 17:31 |
| 2550 | Ischaemic heart disease | 7928y    | Transluminal balloon angioplasty of coronary artery OS        | 1 | 8-7-2013 17:31 |
| 2550 | Ischaemic heart disease | 7928z    | Transluminal balloon angioplasty of coronary artery NOS       | 1 | 8-7-2013 17:31 |
| 2550 | Ischaemic heart disease | 7929     | Other therapeutic transluminal operations on coronary artery  | 1 | 8-7-2013 17:31 |
| 2550 | Ischaemic heart disease | 79290    | Percutaneous transluminal laser coronary angioplasty          | 1 | 8-7-2013 17:31 |
| 2550 | Ischaemic heart disease | 79291    | Percut transluminal coronary thrombolysis with streptokinase  | 1 | 8-7-2013 17:31 |
| 2550 | Ischaemic heart disease | 79291-1  | Percut translum coronary thrombolytic therapy- streptokinase  | 1 | 8-7-2013 17:31 |
| 2550 | Ischaemic heart disease | 79292    | Percut translum inject therap subst to coronary artery NEC    | 1 | 8-7-2013 17:31 |
| 2550 | Ischaemic heart disease | 79293    | Rotary blade coronary angioplasty                             | 1 | 8-7-2013 17:31 |
| 2550 | Ischaemic heart disease | 79294    | Insertion of coronary artery stent                            | 1 | 8-7-2013 17:31 |
| 2550 | Ischaemic heart disease | 79295    | Insertion of drug-eluting coronary artery stent               | 1 | 8-7-2013 17:31 |
| 2550 | Ischaemic heart disease | 79296    | Percutaneous transluminal atherectomy of coronary artery      | 1 | 8-7-2013 17:31 |
| 2550 | Ischaemic heart disease | 7929y    | Other therapeutic transluminal op on coronary artery OS       | 1 | 8-7-2013 17:31 |
| 2550 | Ischaemic heart disease | 7929z    | Other therapeutic transluminal op on coronary artery NOS      | 1 | 8-7-2013 17:31 |
| 2550 | Ischaemic heart disease | 792A     | Diagnostic transluminal operations on coronary artery         | 1 | 8-7-2013 17:31 |
| 2550 | Ischaemic heart disease | 792A0    | Percutaneous transluminal angioscopy                          | 1 | 8-7-2013 17:31 |
| 2550 | Ischaemic heart disease | 792A1    | Intravascular ultrasound of coronary artery                   | 1 | 8-7-2013 17:31 |
| 2550 | Ischaemic heart disease | 792Ay    | Diagnostic transluminal operation on coronary artery OS       | 1 | 8-7-2013 17:31 |
| 2550 | Ischaemic heart disease | 792Az    | Diagnostic transluminal operation on coronary artery NOS      | 1 | 8-7-2013 17:31 |
| 2550 | Ischaemic heart disease | 792B     | Repair of coronary artery NEC                                 | 1 | 8-7-2013 17:31 |
| 2550 | Ischaemic heart disease | 792B0    | Endarterectomy of coronary artery NEC                         | 1 | 8-7-2013 17:31 |
| 2550 | Ischaemic heart disease | 792B0-99 | Coronary endarterectomy                                       | 1 | 8-7-2013 17:31 |
| 2550 | Ischaemic heart disease | 792B1    | Repair of rupture of coronary artery                          | 1 | 8-7-2013 17:31 |
| 2550 | Ischaemic heart disease | 792B2    | Repair of arteriovenous malformation of coronary artery       | 1 | 8-7-2013 17:31 |
| 2550 | Ischaemic heart disease | 792By    | Other specified repair of coronary artery                     | 1 | 8-7-2013 17:31 |
| 2550 | Ischaemic heart disease | 792Bz    | Repair of coronary artery NOS                                 | 1 | 8-7-2013 17:31 |
| 2550 | Ischaemic heart disease | 792C     | Other replacement of coronary artery                          | 1 | 8-7-2013 17:31 |
| 2550 | Ischaemic heart disease | 792C0    | Replacement of coronary arteries using multiple methods       | 1 | 8-7-2013 17:31 |
| 2550 | Ischaemic heart disease | 792Cy    | Other specified replacement of coronary artery                | 1 | 8-7-2013 17:31 |
| 2550 | Ischaemic heart disease | 792Cz    | Replacement of coronary artery NOS                            | 1 | 8-7-2013 17:31 |
| 2550 | Ischaemic heart disease | 792D     | Other bypass of coronary artery                               | 1 | 8-7-2013 17:31 |
| 2550 | Ischaemic heart disease | 792D-98  | Coronary A by-pass anastam NOS                                | 1 | 8-7-2013 17:31 |
| 2550 | Ischaemic heart disease | 792D-99  | Aorto-coronary by-pass anastam                                | 1 | 8-7-2013 17:31 |
| 2550 | Ischaemic heart disease | 792Dy    | Other specified other bypass of coronary artery               | 1 | 8-7-2013 17:31 |
| 2550 | Ischaemic heart disease | 792Dz    | Other bypass of coronary artery NOS                           | 1 | 8-7-2013 17:31 |
| 2550 | Ischaemic heart disease | 792Dz-99 | Aorto-coronary by-pass anastam                                | 1 | 8-7-2013 17:31 |
| 2550 | Ischaemic heart disease | 792E     | Percutaneous coronary intervention                            | 1 | 8-7-2013 17:31 |
| 2550 | Ischaemic heart disease | 792y     | Other specified operations on coronary artery                 | 1 | 8-7-2013 17:31 |
| 2550 | Ischaemic heart disease | 792y-99  | Angioplasty of coronary artery                                | 1 | 8-7-2013 17:31 |
| 2550 | Ischaemic heart disease | 792z     | Coronary artery operations NOS                                | 1 | 8-7-2013 17:31 |
| 2550 | Ischaemic heart disease | 7A0      | Great vessels and pulmonary artery operations                 | 1 | 8-7-2013 17:31 |
| 2550 | Ischaemic heart disease | 7A004    | Repair anomalous pulmonary artery origin ascending aorta      | 1 | 8-7-2013 17:31 |
| 2550 | Ischaemic heart disease | 7A04     | Other connection from aorta to pulmonary artery               | 1 | 8-7-2013 17:31 |
| 2550 | Ischaemic heart disease | 7A06     | Other connection from subclavian artery to pulmonary artery   | 1 | 8-7-2013 17:31 |
| 2550 | Ischaemic heart disease | 7A062    | Creation anastomosis subclavian artery to pulmonary art NEC   | 1 | 8-7-2013 17:31 |
| 2550 | Ischaemic heart disease | 7A062-1  | Blalock anastomosis of subclavian artery to pulmonary artery  | 1 | 8-7-2013 17:31 |
| 2550 | Ischaemic heart disease | 7A062-2  | Taussig anastomosis of subclavian artery to pulmonary artery  | 1 | 8-7-2013 17:31 |
| 2550 | Ischaemic heart disease | 7A066    | Perc translum occlusion anast pulmonary artery subclavian art | 1 | 8-7-2013 17:31 |

|      |                         |          |                                                              |   |                |
|------|-------------------------|----------|--------------------------------------------------------------|---|----------------|
| 2550 | Ischaemic heart disease | 7A07     | Other connection to pulmonary artery                         | 1 | 8-7-2013 17:31 |
| 2550 | Ischaemic heart disease | 7A070    | Creation of anastomosis from vena cava to pulmonary artery   | 1 | 8-7-2013 17:31 |
| 2550 | Ischaemic heart disease | 7A070-1  | Creation Glenn anastomosis from vena cava to pulmonary art   | 1 | 8-7-2013 17:31 |
| 2550 | Ischaemic heart disease | 7A071    | Removal anastomosis between vena cava and pulmonary artery   | 1 | 8-7-2013 17:31 |
| 2550 | Ischaemic heart disease | 7A07y    | Other specified other connection to pulmonary artery         | 1 | 8-7-2013 17:31 |
| 2550 | Ischaemic heart disease | 7A07z    | Other connection to pulmonary artery NOS                     | 1 | 8-7-2013 17:31 |
| 2550 | Ischaemic heart disease | 7A08     | Repair of pulmonary artery                                   | 1 | 8-7-2013 17:31 |
| 2550 | Ischaemic heart disease | 7A080    | Repair of pulmonary artery using prosthesis                  | 1 | 8-7-2013 17:31 |
| 2550 | Ischaemic heart disease | 7A081    | Repair of pulmonary artery using patch                       | 1 | 8-7-2013 17:31 |
| 2550 | Ischaemic heart disease | 7A082    | Repair of anomalous pulmonary artery NEC                     | 1 | 8-7-2013 17:31 |
| 2550 | Ischaemic heart disease | 7A083    | Repair of pulmonary arterial sling                           | 1 | 8-7-2013 17:31 |
| 2550 | Ischaemic heart disease | 7A08y    | Other specified repair of pulmonary artery                   | 1 | 8-7-2013 17:31 |
| 2550 | Ischaemic heart disease | 7A08z    | Repair of pulmonary artery NOS                               | 1 | 8-7-2013 17:31 |
| 2550 | Ischaemic heart disease | 7A09     | Other open operations on pulmonary artery                    | 1 | 8-7-2013 17:31 |
| 2550 | Ischaemic heart disease | 7A090    | Application of band to pulmonary artery                      | 1 | 8-7-2013 17:31 |
| 2550 | Ischaemic heart disease | 7A091    | Adjustment of band to pulmonary artery                       | 1 | 8-7-2013 17:31 |
| 2550 | Ischaemic heart disease | 7A092    | Removal of band from pulmonary artery                        | 1 | 8-7-2013 17:31 |
| 2550 | Ischaemic heart disease | 7A093    | Open embolectomy of pulmonary artery                         | 1 | 8-7-2013 17:31 |
| 2550 | Ischaemic heart disease | 7A093-1  | Trendelenburg pulmonary embolectomy                          | 1 | 8-7-2013 17:31 |
| 2550 | Ischaemic heart disease | 7A094    | Open embolisation of pulmonary artery                        | 1 | 8-7-2013 17:31 |
| 2550 | Ischaemic heart disease | 7A095    | Pulmonary artery ligation                                    | 1 | 8-7-2013 17:31 |
| 2550 | Ischaemic heart disease | 7A09y    | Other specified other open operation on pulmonary artery     | 1 | 8-7-2013 17:31 |
| 2550 | Ischaemic heart disease | 7A09z    | Other open operation on pulmonary artery NOS                 | 1 | 8-7-2013 17:31 |
| 2550 | Ischaemic heart disease | 7A0A     | Transluminal operations on pulmonary artery                  | 1 | 8-7-2013 17:31 |
| 2550 | Ischaemic heart disease | 7A0A0    | Percutaneous transluminal embolisation of pulmonary artery   | 1 | 8-7-2013 17:31 |
| 2550 | Ischaemic heart disease | 7A0A1    | Percutaneous transluminal embolectomy of pulmonary artery    | 1 | 8-7-2013 17:31 |
| 2550 | Ischaemic heart disease | 7A0A2    | Arteriography of pulmonary artery                            | 1 | 8-7-2013 17:31 |
| 2550 | Ischaemic heart disease | 7A0A2-98 | Bronchial artery angiography                                 | 1 | 8-7-2013 17:31 |
| 2550 | Ischaemic heart disease | 7A0A2-99 | Pulmonary artery angiography                                 | 1 | 8-7-2013 17:31 |
| 2550 | Ischaemic heart disease | 7A0A7    | Percut transluminal insertion of stent into pulmonary artery | 1 | 8-7-2013 17:31 |
| 2550 | Ischaemic heart disease | 7A0Ay    | Other specified transluminal operation on pulmonary artery   | 1 | 8-7-2013 17:31 |
| 2550 | Ischaemic heart disease | 7A0Az    | Transluminal operation on pulmonary artery NOS               | 1 | 8-7-2013 17:31 |
| 2550 | Ischaemic heart disease | 7A0y     | Great vessel or pulmonary artery operations OS               | 1 | 8-7-2013 17:31 |
| 2550 | Ischaemic heart disease | 7A0z     | Great vessel and pulmonary artery operations NOS             | 1 | 8-7-2013 17:31 |
| 2550 | Ischaemic heart disease | 7A123-1  | Aorto biiliac graft                                          | 1 | 8-7-2013 17:31 |
| 2550 | Ischaemic heart disease | 7N413    | [SO]Coronary artery                                          | 1 | 8-7-2013 17:31 |
| 2550 | Ischaemic heart disease | 7N480    | [SO]Pulmonary artery                                         | 1 | 8-7-2013 17:31 |
| 2550 | Ischaemic heart disease | 8B27     | Antianginal therapy                                          | 1 | 8-7-2013 17:31 |
| 2550 | Ischaemic heart disease | G30      | Acute myocardial infarction                                  | 1 | 8-7-2013 17:31 |
| 2550 | Ischaemic heart disease | G30-1    | Attack - heart                                               | 1 | 8-7-2013 17:31 |
| 2550 | Ischaemic heart disease | G30-2    | Coronary thrombosis                                          | 1 | 8-7-2013 17:31 |
| 2550 | Ischaemic heart disease | G30-3    | Cardiac rupture following myocardial infarction (MI)         | 1 | 8-7-2013 17:31 |
| 2550 | Ischaemic heart disease | G30-4    | Heart attack                                                 | 1 | 8-7-2013 17:31 |
| 2550 | Ischaemic heart disease | G30-5    | MI - acute myocardial infarction                             | 1 | 8-7-2013 17:31 |
| 2550 | Ischaemic heart disease | G30-6    | Thrombosis - coronary                                        | 1 | 8-7-2013 17:31 |
| 2550 | Ischaemic heart disease | G30-7    | Silent myocardial infarction                                 | 1 | 8-7-2013 17:31 |
| 2550 | Ischaemic heart disease | G30-98   | Coronary thrombosis                                          | 1 | 8-7-2013 17:31 |
| 2550 | Ischaemic heart disease | G30-99   | Myocardial Infarction                                        | 1 | 8-7-2013 17:31 |
| 2550 | Ischaemic heart disease | G300     | Acute anterolateral infarction                               | 1 | 8-7-2013 17:31 |
| 2550 | Ischaemic heart disease | G301     | Other specified anterior myocardial infarction               | 1 | 8-7-2013 17:31 |
| 2550 | Ischaemic heart disease | G3010    | Acute anteroapical infarction                                | 1 | 8-7-2013 17:31 |
| 2550 | Ischaemic heart disease | G3011    | Acute anteroseptal infarction                                | 1 | 8-7-2013 17:31 |
| 2550 | Ischaemic heart disease | G301z    | Anterior myocardial infarction NOS                           | 1 | 8-7-2013 17:31 |
| 2550 | Ischaemic heart disease | G302     | Acute inferolateral infarction                               | 1 | 8-7-2013 17:31 |
| 2550 | Ischaemic heart disease | G303     | Acute inferoposterior infarction                             | 1 | 8-7-2013 17:31 |
| 2550 | Ischaemic heart disease | G304     | Posterior myocardial infarction NOS                          | 1 | 8-7-2013 17:31 |
| 2550 | Ischaemic heart disease | G305     | Lateral myocardial infarction NOS                            | 1 | 8-7-2013 17:31 |
| 2550 | Ischaemic heart disease | G306     | True posterior myocardial infarction                         | 1 | 8-7-2013 17:31 |
| 2550 | Ischaemic heart disease | G307     | Acute subendocardial infarction                              | 1 | 8-7-2013 17:31 |
| 2550 | Ischaemic heart disease | G3070    | Acute non-Q wave infarction                                  | 1 | 8-7-2013 17:31 |
| 2550 | Ischaemic heart disease | G3071    | Acute non-ST segment elevation myocardial infarction         | 1 | 8-7-2013 17:31 |
| 2550 | Ischaemic heart disease | G308     | Inferior myocardial infarction NOS                           | 1 | 8-7-2013 17:31 |
| 2550 | Ischaemic heart disease | G309     | Acute Q-wave infarct                                         | 1 | 8-7-2013 17:31 |
| 2550 | Ischaemic heart disease | G30A     | Mural thrombosis                                             | 1 | 8-7-2013 17:31 |
| 2550 | Ischaemic heart disease | G30B     | Acute posterolateral myocardial infarction                   | 1 | 8-7-2013 17:31 |
| 2550 | Ischaemic heart disease | G30X     | Acute transmural myocardial infarction of unspecif site      | 1 | 8-7-2013 17:31 |
| 2550 | Ischaemic heart disease | G30X0    | Acute ST segment elevation myocardial infarction             | 1 | 8-7-2013 17:31 |
| 2550 | Ischaemic heart disease | G30y     | Other acute myocardial infarction                            | 1 | 8-7-2013 17:31 |
| 2550 | Ischaemic heart disease | G30y0    | Acute atrial infarction                                      | 1 | 8-7-2013 17:31 |
| 2550 | Ischaemic heart disease | G30y1    | Acute papillary muscle infarction                            | 1 | 8-7-2013 17:31 |
| 2550 | Ischaemic heart disease | G30y2    | Acute septal infarction                                      | 1 | 8-7-2013 17:31 |
| 2550 | Ischaemic heart disease | G30yz    | Other acute myocardial infarction NOS                        | 1 | 8-7-2013 17:31 |
| 2550 | Ischaemic heart disease | G30z     | Acute myocardial infarction NOS                              | 1 | 8-7-2013 17:31 |
| 2550 | Ischaemic heart disease | G31      | Other acute and subacute ischaemic heart disease             | 1 | 8-7-2013 17:31 |
| 2550 | Ischaemic heart disease | G31-99   | Acute/subacute IHD NOS                                       | 1 | 8-7-2013 17:31 |
| 2550 | Ischaemic heart disease | G310     | Postmyocardial infarction syndrome                           | 1 | 8-7-2013 17:31 |
| 2550 | Ischaemic heart disease | G310-1   | Dressler's syndrome                                          | 1 | 8-7-2013 17:31 |
| 2550 | Ischaemic heart disease | G311     | Preinfarction syndrome                                       | 1 | 8-7-2013 17:31 |

|      |                         |          |                                                              |   |                |
|------|-------------------------|----------|--------------------------------------------------------------|---|----------------|
| 2550 | Ischaemic heart disease | G311-1   | Crescendo angina                                             | 1 | 8-7-2013 17:31 |
| 2550 | Ischaemic heart disease | G311-2   | Impending infarction                                         | 1 | 8-7-2013 17:31 |
| 2550 | Ischaemic heart disease | G311-3   | Unstable angina                                              | 1 | 8-7-2013 17:31 |
| 2550 | Ischaemic heart disease | G311-4   | Angina at rest                                               | 1 | 8-7-2013 17:31 |
| 2550 | Ischaemic heart disease | G3110    | Myocardial infarction aborted                                | 1 | 8-7-2013 17:31 |
| 2550 | Ischaemic heart disease | G3110-1  | MI - myocardial infarction aborted                           | 1 | 8-7-2013 17:31 |
| 2550 | Ischaemic heart disease | G3111    | Unstable angina                                              | 1 | 8-7-2013 17:31 |
| 2550 | Ischaemic heart disease | G3112    | Angina at rest                                               | 1 | 8-7-2013 17:31 |
| 2550 | Ischaemic heart disease | G3113    | Refractory angina                                            | 1 | 8-7-2013 17:31 |
| 2550 | Ischaemic heart disease | G3114    | Worsening angina                                             | 1 | 8-7-2013 17:31 |
| 2550 | Ischaemic heart disease | G3115    | Acute coronary syndrome                                      | 1 | 8-7-2013 17:31 |
| 2550 | Ischaemic heart disease | G311z    | Preinfarction syndrome NOS                                   | 1 | 8-7-2013 17:31 |
| 2550 | Ischaemic heart disease | G312     | Coronary thrombosis not resulting in myocardial infarction   | 1 | 8-7-2013 17:31 |
| 2550 | Ischaemic heart disease | G31y     | Other acute and subacute ischaemic heart disease             | 1 | 8-7-2013 17:31 |
| 2550 | Ischaemic heart disease | G31y0    | Acute coronary insufficiency                                 | 1 | 8-7-2013 17:31 |
| 2550 | Ischaemic heart disease | G31y0-99 | Acute coronary syndrome                                      | 1 | 8-7-2013 17:31 |
| 2550 | Ischaemic heart disease | G31y1    | Microinfarction of heart                                     | 1 | 8-7-2013 17:31 |
| 2550 | Ischaemic heart disease | G31y2    | Subendocardial ischaemia                                     | 1 | 8-7-2013 17:31 |
| 2550 | Ischaemic heart disease | G31y3    | Transient myocardial ischaemia                               | 1 | 8-7-2013 17:31 |
| 2550 | Ischaemic heart disease | G31yz    | Other acute and subacute ischaemic heart disease NOS         | 1 | 8-7-2013 17:31 |
| 2550 | Ischaemic heart disease | G33      | Angina pectoris                                              | 1 | 8-7-2013 17:31 |
| 2550 | Ischaemic heart disease | G330     | Angina decubitus                                             | 1 | 8-7-2013 17:31 |
| 2550 | Ischaemic heart disease | G3300    | Nocturnal angina                                             | 1 | 8-7-2013 17:31 |
| 2550 | Ischaemic heart disease | G330z    | Angina decubitus NOS                                         | 1 | 8-7-2013 17:31 |
| 2550 | Ischaemic heart disease | G331     | Prinzmetal's angina                                          | 1 | 8-7-2013 17:31 |
| 2550 | Ischaemic heart disease | G331-1   | Variant angina pectoris                                      | 1 | 8-7-2013 17:31 |
| 2550 | Ischaemic heart disease | G332     | Coronary artery spasm                                        | 1 | 8-7-2013 17:31 |
| 2550 | Ischaemic heart disease | G33z     | Angina pectoris NOS                                          | 1 | 8-7-2013 17:31 |
| 2550 | Ischaemic heart disease | G33z0    | Status anginosus                                             | 1 | 8-7-2013 17:31 |
| 2550 | Ischaemic heart disease | G33z1    | Stenocardia                                                  | 1 | 8-7-2013 17:31 |
| 2550 | Ischaemic heart disease | G33z2    | Syncope anginosa                                             | 1 | 8-7-2013 17:31 |
| 2550 | Ischaemic heart disease | G33z3    | Angina on effort                                             | 1 | 8-7-2013 17:31 |
| 2550 | Ischaemic heart disease | G33z4    | Ischaemic chest pain                                         | 1 | 8-7-2013 17:31 |
| 2550 | Ischaemic heart disease | G33z5    | Post infarct angina                                          | 1 | 8-7-2013 17:31 |
| 2550 | Ischaemic heart disease | G33z6    | New onset angina                                             | 1 | 8-7-2013 17:31 |
| 2550 | Ischaemic heart disease | G33z7    | Stable angina                                                | 1 | 8-7-2013 17:31 |
| 2550 | Ischaemic heart disease | G33zz    | Angina pectoris NOS                                          | 1 | 8-7-2013 17:31 |
| 2550 | Ischaemic heart disease | G34      | Other chronic ischaemic heart disease                        | 1 | 8-7-2013 17:31 |
| 2550 | Ischaemic heart disease | G340     | Coronary atherosclerosis                                     | 1 | 8-7-2013 17:31 |
| 2550 | Ischaemic heart disease | G340-1   | Triple vessel disease of the heart                           | 1 | 8-7-2013 17:31 |
| 2550 | Ischaemic heart disease | G340-2   | Coronary artery disease                                      | 1 | 8-7-2013 17:31 |
| 2550 | Ischaemic heart disease | G3400    | Single coronary vessel disease                               | 1 | 8-7-2013 17:31 |
| 2550 | Ischaemic heart disease | G3401    | Double coronary vessel disease                               | 1 | 8-7-2013 17:31 |
| 2550 | Ischaemic heart disease | G343     | Ischaemic cardiomyopathy                                     | 1 | 8-7-2013 17:31 |
| 2550 | Ischaemic heart disease | G34yz    | Other specified chronic ischaemic heart disease NOS          | 1 | 8-7-2013 17:31 |
| 2550 | Ischaemic heart disease | G34z0    | Asymptomatic coronary heart disease                          | 1 | 8-7-2013 17:31 |
| 2550 | Ischaemic heart disease | G35      | Subsequent myocardial infarction                             | 1 | 8-7-2013 17:31 |
| 2550 | Ischaemic heart disease | G350     | Subsequent myocardial infarction of anterior wall            | 1 | 8-7-2013 17:31 |
| 2550 | Ischaemic heart disease | G351     | Subsequent myocardial infarction of inferior wall            | 1 | 8-7-2013 17:31 |
| 2550 | Ischaemic heart disease | G353     | Subsequent myocardial infarction of other sites              | 1 | 8-7-2013 17:31 |
| 2550 | Ischaemic heart disease | G35X     | Subsequent myocardial infarction of unspecified site         | 1 | 8-7-2013 17:31 |
| 2550 | Ischaemic heart disease | G36      | Certain current complication follow acute myocardial infarct | 1 | 8-7-2013 17:31 |
| 2550 | Ischaemic heart disease | G360     | Haemopericardium/current comp folow acut myocard infarct     | 1 | 8-7-2013 17:31 |
| 2550 | Ischaemic heart disease | G361     | Atrial septal defect/curr comp folow acut myocardial infarct | 1 | 8-7-2013 17:31 |
| 2550 | Ischaemic heart disease | G362     | Ventric septal defect/curr comp fol acut myocardial infarctn | 1 | 8-7-2013 17:31 |
| 2550 | Ischaemic heart disease | G363     | Ruptur cardiac wall w/out haemopericard/cur comp fol ac MI   | 1 | 8-7-2013 17:31 |
| 2550 | Ischaemic heart disease | G364     | Ruptur chordae tendinae/curr comp fol acute myocard infarct  | 1 | 8-7-2013 17:31 |
| 2550 | Ischaemic heart disease | G365     | Rupture papillary muscle/curr comp fol acute myocard infarct | 1 | 8-7-2013 17:31 |
| 2550 | Ischaemic heart disease | G366     | Thrombosis atrium,auric append&vent/curr comp foll acute MI  | 1 | 8-7-2013 17:31 |
| 2550 | Ischaemic heart disease | G37      | Cardiac syndrome X                                           | 1 | 8-7-2013 17:31 |
| 2550 | Ischaemic heart disease | G38      | Postoperative myocardial infarction                          | 1 | 8-7-2013 17:31 |
| 2550 | Ischaemic heart disease | G380     | Postoperative transmural myocardial infarction anterior wall | 1 | 8-7-2013 17:31 |
| 2550 | Ischaemic heart disease | G381     | Postoperative transmural myocardial infarction inferior wall | 1 | 8-7-2013 17:31 |
| 2550 | Ischaemic heart disease | G382     | Postoperative transmural myocardial infarction other sites   | 1 | 8-7-2013 17:31 |
| 2550 | Ischaemic heart disease | G383     | Postoperative transmural myocardial infarction unspec site   | 1 | 8-7-2013 17:31 |
| 2550 | Ischaemic heart disease | G384     | Postoperative subendocardial myocardial infarction           | 1 | 8-7-2013 17:31 |
| 2550 | Ischaemic heart disease | G38z     | Postoperative myocardial infarction, unspecified             | 1 | 8-7-2013 17:31 |
| 2550 | Ischaemic heart disease | G3y      | Other specified ischaemic heart disease                      | 1 | 8-7-2013 17:31 |
| 2550 | Ischaemic heart disease | Gyu3     | [X]Ischaemic heart diseases                                  | 1 | 8-7-2013 17:31 |
| 2550 | Ischaemic heart disease | Gyu34    | [X]Acute transmural myocardial infarction of unspecif site   | 1 | 8-7-2013 17:31 |
| 2550 | Ischaemic heart disease | J0833    | Ludwig's angina                                              | 1 | 8-7-2013 17:31 |
| 2550 | Ischaemic heart disease | P500     | Absent septum between aorta and pulmonary artery             | 1 | 8-7-2013 17:31 |
| 2550 | Ischaemic heart disease | P6y4     | Coronary artery anomaly                                      | 1 | 8-7-2013 17:31 |
| 2550 | Ischaemic heart disease | P6y41    | Single coronary artery                                       | 1 | 8-7-2013 17:31 |
| 2550 | Ischaemic heart disease | P6y44    | Anomalous coronary artery communication                      | 1 | 8-7-2013 17:31 |
| 2550 | Ischaemic heart disease | P6y4z    | Coronary artery anomaly NOS                                  | 1 | 8-7-2013 17:31 |
| 2550 | Ischaemic heart disease | P6y7     | Myocardial bridge of coronary artery                         | 1 | 8-7-2013 17:31 |
| 2550 | Ischaemic heart disease | P73      | Pulmonary artery anomalies                                   | 1 | 8-7-2013 17:31 |

|                              |      |                                             |   |                |
|------------------------------|------|---------------------------------------------|---|----------------|
| 2550 Ischaemic heart disease | P731 | Pulmonary artery agenesis                   | 1 | 8-7-2013 17:31 |
| 2550 Ischaemic heart disease | P733 | Coarctation of the pulmonary artery         | 1 | 8-7-2013 17:31 |
| 2550 Ischaemic heart disease | P734 | Hypoplasia of the pulmonary artery          | 1 | 8-7-2013 17:31 |
| 2550 Ischaemic heart disease | P737 | Pulmonary artery aneurysm                   | 1 | 8-7-2013 17:31 |
| 2550 Ischaemic heart disease | P73y | Other specified anomaly of pulmonary artery | 1 | 8-7-2013 17:31 |
| 2550 Ischaemic heart disease | P73z | Pulmonary artery anomaly NOS                | 1 | 8-7-2013 17:31 |



| Group Id | Group Name | ReadTerm | ReadDesc                                                     | Group Version | Date Of Version |
|----------|------------|----------|--------------------------------------------------------------|---------------|-----------------|
| 2551     | Stroke     | G6       | Cerebrovascular disease                                      | 1             | 8-7-2013 17:43  |
| 2551     | Stroke     | G6-99    | Cerebral haemorrhage                                         | 1             | 8-7-2013 17:43  |
| 2551     | Stroke     | G60      | Subarachnoid haemorrhage                                     | 1             | 8-7-2013 17:43  |
| 2551     | Stroke     | G600     | Ruptured berry aneurysm                                      | 1             | 8-7-2013 17:43  |
| 2551     | Stroke     | G601     | Subarachnoid haemorrhage from carotid siphon and bifurcation | 1             | 8-7-2013 17:43  |
| 2551     | Stroke     | G602     | Subarachnoid haemorrhage from middle cerebral artery         | 1             | 8-7-2013 17:43  |
| 2551     | Stroke     | G603     | Subarachnoid haemorrhage from anterior communicating artery  | 1             | 8-7-2013 17:43  |
| 2551     | Stroke     | G604     | Subarachnoid haemorrhage from posterior communicating artery | 1             | 8-7-2013 17:43  |
| 2551     | Stroke     | G605     | Subarachnoid haemorrhage from basilar artery                 | 1             | 8-7-2013 17:43  |
| 2551     | Stroke     | G606     | Subarachnoid haemorrhage from vertebral artery               | 1             | 8-7-2013 17:43  |
| 2551     | Stroke     | G60X     | Subarachnoid haemorrh from intracranial artery, unspecif     | 1             | 8-7-2013 17:43  |
| 2551     | Stroke     | G60z     | Subarachnoid haemorrhage NOS                                 | 1             | 8-7-2013 17:43  |
| 2551     | Stroke     | G61      | Intracerebral haemorrhage                                    | 1             | 8-7-2013 17:43  |
| 2551     | Stroke     | G61-1    | CVA - cerebrovascular accid due to intracerebral haemorrhage | 1             | 8-7-2013 17:43  |
| 2551     | Stroke     | G61-2    | Stroke due to intracerebral haemorrhage                      | 1             | 8-7-2013 17:43  |
| 2551     | Stroke     | G61-98   | Cerebral haemorrhage NOS                                     | 1             | 8-7-2013 17:43  |
| 2551     | Stroke     | G61-99   | Cerebral haemorrhage                                         | 1             | 8-7-2013 17:43  |
| 2551     | Stroke     | G610     | Cortical haemorrhage                                         | 1             | 8-7-2013 17:43  |
| 2551     | Stroke     | G611     | Internal capsule haemorrhage                                 | 1             | 8-7-2013 17:43  |
| 2551     | Stroke     | G612     | Basal nucleus haemorrhage                                    | 1             | 8-7-2013 17:43  |
| 2551     | Stroke     | G613     | Cerebellar haemorrhage                                       | 1             | 8-7-2013 17:43  |
| 2551     | Stroke     | G614     | Pontine haemorrhage                                          | 1             | 8-7-2013 17:43  |
| 2551     | Stroke     | G615     | Bulbar haemorrhage                                           | 1             | 8-7-2013 17:43  |
| 2551     | Stroke     | G616     | External capsule haemorrhage                                 | 1             | 8-7-2013 17:43  |
| 2551     | Stroke     | G617     | Intracerebral haemorrhage, intraventricular                  | 1             | 8-7-2013 17:43  |
| 2551     | Stroke     | G618     | Intracerebral haemorrhage, multiple localized                | 1             | 8-7-2013 17:43  |
| 2551     | Stroke     | G61X     | Intracerebral haemorrhage in hemisphere, unspecified         | 1             | 8-7-2013 17:43  |
| 2551     | Stroke     | G61X0    | Left sided intracerebral haemorrhage, unspecified            | 1             | 8-7-2013 17:43  |
| 2551     | Stroke     | G61X1    | Right sided intracerebral haemorrhage, unspecified           | 1             | 8-7-2013 17:43  |
| 2551     | Stroke     | G61z     | Intracerebral haemorrhage NOS                                | 1             | 8-7-2013 17:43  |
| 2551     | Stroke     | G62      | Other and unspecified intracranial haemorrhage               | 1             | 8-7-2013 17:43  |
| 2551     | Stroke     | G620     | Extradural haemorrhage - nontraumatic                        | 1             | 8-7-2013 17:43  |
| 2551     | Stroke     | G620-99  | Extradural haemorrhage                                       | 1             | 8-7-2013 17:43  |
| 2551     | Stroke     | G621     | Subdural haemorrhage - nontraumatic                          | 1             | 8-7-2013 17:43  |
| 2551     | Stroke     | G621-99  | Subdural haemorrhage                                         | 1             | 8-7-2013 17:43  |
| 2551     | Stroke     | G622     | Subdural haematoma - nontraumatic                            | 1             | 8-7-2013 17:43  |
| 2551     | Stroke     | G623     | Subdural haemorrhage NOS                                     | 1             | 8-7-2013 17:43  |
| 2551     | Stroke     | G62z     | Intracranial haemorrhage NOS                                 | 1             | 8-7-2013 17:43  |
| 2551     | Stroke     | G62z-99  | Cerebral haemorrhage NOS                                     | 1             | 8-7-2013 17:43  |
| 2551     | Stroke     | G63      | Precerebral arterial occlusion                               | 1             | 8-7-2013 17:43  |
| 2551     | Stroke     | G63-1    | Infarction - precerebral                                     | 1             | 8-7-2013 17:43  |
| 2551     | Stroke     | G63-2    | Stenosis of precerebral arteries                             | 1             | 8-7-2013 17:43  |
| 2551     | Stroke     | G630     | Basilar artery occlusion                                     | 1             | 8-7-2013 17:43  |
| 2551     | Stroke     | G630-99  | Basilar artery occluded                                      | 1             | 8-7-2013 17:43  |
| 2551     | Stroke     | G631     | Carotid artery occlusion                                     | 1             | 8-7-2013 17:43  |
| 2551     | Stroke     | G631-1   | Stenosis, carotid artery                                     | 1             | 8-7-2013 17:43  |
| 2551     | Stroke     | G631-2   | Thrombosis, carotid artery                                   | 1             | 8-7-2013 17:43  |
| 2551     | Stroke     | G631-99  | Carotid artery occluded                                      | 1             | 8-7-2013 17:43  |
| 2551     | Stroke     | G632     | Vertebral artery occlusion                                   | 1             | 8-7-2013 17:43  |
| 2551     | Stroke     | G632-99  | Vertebral artery occluded                                    | 1             | 8-7-2013 17:43  |
| 2551     | Stroke     | G633     | Multiple and bilateral precerebral arterial occlusion        | 1             | 8-7-2013 17:43  |
| 2551     | Stroke     | G634     | Carotid artery stenosis                                      | 1             | 8-7-2013 17:43  |
| 2551     | Stroke     | G63y     | Other precerebral artery occlusion                           | 1             | 8-7-2013 17:43  |
| 2551     | Stroke     | G63y0    | Cerebral infarct due to thrombosis of precerebral arteries   | 1             | 8-7-2013 17:43  |
| 2551     | Stroke     | G63y1    | Cerebral infarction due to embolism of precerebral arteries  | 1             | 8-7-2013 17:43  |
| 2551     | Stroke     | G63z     | Precerebral artery occlusion NOS                             | 1             | 8-7-2013 17:43  |
| 2551     | Stroke     | G63z-99  | Precerebral A. occlusion NOS                                 | 1             | 8-7-2013 17:43  |
| 2551     | Stroke     | G64      | Cerebral arterial occlusion                                  | 1             | 8-7-2013 17:43  |
| 2551     | Stroke     | G64-1    | CVA - cerebral artery occlusion                              | 1             | 8-7-2013 17:43  |
| 2551     | Stroke     | G64-2    | Infarction - cerebral                                        | 1             | 8-7-2013 17:43  |
| 2551     | Stroke     | G64-3    | Stroke due to cerebral arterial occlusion                    | 1             | 8-7-2013 17:43  |
| 2551     | Stroke     | G640     | Cerebral thrombosis                                          | 1             | 8-7-2013 17:43  |
| 2551     | Stroke     | G6400    | Cerebral infarction due to thrombosis of cerebral arteries   | 1             | 8-7-2013 17:43  |
| 2551     | Stroke     | G641     | Cerebral embolism                                            | 1             | 8-7-2013 17:43  |
| 2551     | Stroke     | G641-1   | Cerebral embolus                                             | 1             | 8-7-2013 17:43  |
| 2551     | Stroke     | G6410    | Cerebral infarction due to embolism of cerebral arteries     | 1             | 8-7-2013 17:43  |
| 2551     | Stroke     | G64z     | Cerebral infarction NOS                                      | 1             | 8-7-2013 17:43  |
| 2551     | Stroke     | G64z-1   | Brainstem infarction NOS                                     | 1             | 8-7-2013 17:43  |
| 2551     | Stroke     | G64z-2   | Cerebellar infarction                                        | 1             | 8-7-2013 17:43  |
| 2551     | Stroke     | G64z-99  | Cerebral A. occlusion NOS                                    | 1             | 8-7-2013 17:43  |
| 2551     | Stroke     | G64z0    | Brainstem infarction                                         | 1             | 8-7-2013 17:43  |
| 2551     | Stroke     | G64z1    | Wallenberg syndrome                                          | 1             | 8-7-2013 17:43  |
| 2551     | Stroke     | G64z1-1  | Lateral medullary syndrome                                   | 1             | 8-7-2013 17:43  |
| 2551     | Stroke     | G64z2    | Left sided cerebral infarction                               | 1             | 8-7-2013 17:43  |
| 2551     | Stroke     | G64z3    | Right sided cerebral infarction                              | 1             | 8-7-2013 17:43  |
| 2551     | Stroke     | G64z4    | Infarction of basal ganglia                                  | 1             | 8-7-2013 17:43  |
| 2551     | Stroke     | G65      | Transient cerebral ischaemia                                 | 1             | 8-7-2013 17:43  |

|             |         |                                                              |   |                |
|-------------|---------|--------------------------------------------------------------|---|----------------|
| 2551 Stroke | G65-1   | Drop attack                                                  | 1 | 8-7-2013 17:43 |
| 2551 Stroke | G65-2   | Transient ischaemic attack                                   | 1 | 8-7-2013 17:43 |
| 2551 Stroke | G65-3   | Vertebro-basilar insufficiency                               | 1 | 8-7-2013 17:43 |
| 2551 Stroke | G65-99  | Transient Ischaemic Attacks                                  | 1 | 8-7-2013 17:43 |
| 2551 Stroke | G650    | Basilar artery syndrome                                      | 1 | 8-7-2013 17:43 |
| 2551 Stroke | G650-1  | Insufficiency - basilar artery                               | 1 | 8-7-2013 17:43 |
| 2551 Stroke | G651    | Vertebral artery syndrome                                    | 1 | 8-7-2013 17:43 |
| 2551 Stroke | G6510   | Vertebro-basilar artery syndrome                             | 1 | 8-7-2013 17:43 |
| 2551 Stroke | G652    | Subclavian steal syndrome                                    | 1 | 8-7-2013 17:43 |
| 2551 Stroke | G653    | Carotid artery syndrome hemispheric                          | 1 | 8-7-2013 17:43 |
| 2551 Stroke | G654    | Multiple and bilateral precerebral artery syndromes          | 1 | 8-7-2013 17:43 |
| 2551 Stroke | G655    | Transient global amnesia                                     | 1 | 8-7-2013 17:43 |
| 2551 Stroke | G656    | Vertebrobasilar insufficiency                                | 1 | 8-7-2013 17:43 |
| 2551 Stroke | G657    | Carotid territory transient ischaemic attack                 | 1 | 8-7-2013 17:43 |
| 2551 Stroke | G65y    | Other transient cerebral ischaemia                           | 1 | 8-7-2013 17:43 |
| 2551 Stroke | G65z    | Transient cerebral ischaemia NOS                             | 1 | 8-7-2013 17:43 |
| 2551 Stroke | G65z-99 | Transient Ischaemic Attacks                                  | 1 | 8-7-2013 17:43 |
| 2551 Stroke | G65z0   | Impending cerebral ischaemia                                 | 1 | 8-7-2013 17:43 |
| 2551 Stroke | G65z1   | Intermittent cerebral ischaemia                              | 1 | 8-7-2013 17:43 |
| 2551 Stroke | G65zz   | Transient cerebral ischaemia NOS                             | 1 | 8-7-2013 17:43 |
| 2551 Stroke | G66     | Stroke and cerebrovascular accident unspecified              | 1 | 8-7-2013 17:43 |
| 2551 Stroke | G66-1   | CVA unspecified                                              | 1 | 8-7-2013 17:43 |
| 2551 Stroke | G66-2   | Stroke unspecified                                           | 1 | 8-7-2013 17:43 |
| 2551 Stroke | G66-3   | CVA - Cerebrovascular accident unspecified                   | 1 | 8-7-2013 17:43 |
| 2551 Stroke | G66-98  | Stroke/CVA - undefined                                       | 1 | 8-7-2013 17:43 |
| 2551 Stroke | G66-99  | Stroke                                                       | 1 | 8-7-2013 17:43 |
| 2551 Stroke | G660    | Middle cerebral artery syndrome                              | 1 | 8-7-2013 17:43 |
| 2551 Stroke | G661    | Anterior cerebral artery syndrome                            | 1 | 8-7-2013 17:43 |
| 2551 Stroke | G662    | Posterior cerebral artery syndrome                           | 1 | 8-7-2013 17:43 |
| 2551 Stroke | G663    | Brain stem stroke syndrome                                   | 1 | 8-7-2013 17:43 |
| 2551 Stroke | G664    | Cerebellar stroke syndrome                                   | 1 | 8-7-2013 17:43 |
| 2551 Stroke | G665    | Pure motor lacunar syndrome                                  | 1 | 8-7-2013 17:43 |
| 2551 Stroke | G666    | Pure sensory lacunar syndrome                                | 1 | 8-7-2013 17:43 |
| 2551 Stroke | G667    | Left sided CVA                                               | 1 | 8-7-2013 17:43 |
| 2551 Stroke | G668    | Right sided CVA                                              | 1 | 8-7-2013 17:43 |
| 2551 Stroke | G669    | Cerebral palsy, not congenital or infantile, acute           | 1 | 8-7-2013 17:43 |
| 2551 Stroke | G67     | Other cerebrovascular disease                                | 1 | 8-7-2013 17:43 |
| 2551 Stroke | G670    | Cerebral atherosclerosis                                     | 1 | 8-7-2013 17:43 |
| 2551 Stroke | G670-1  | Precerebral atherosclerosis                                  | 1 | 8-7-2013 17:43 |
| 2551 Stroke | G670-99 | Cerebral arteriosclerosis                                    | 1 | 8-7-2013 17:43 |
| 2551 Stroke | G671    | Generalised ischaemic cerebrovascular disease NOS            | 1 | 8-7-2013 17:43 |
| 2551 Stroke | G6710   | Acute cerebrovascular insufficiency NOS                      | 1 | 8-7-2013 17:43 |
| 2551 Stroke | G6711   | Chronic cerebral ischaemia                                   | 1 | 8-7-2013 17:43 |
| 2551 Stroke | G671z   | Generalised ischaemic cerebrovascular disease NOS            | 1 | 8-7-2013 17:43 |
| 2551 Stroke | G672    | Hypertensive encephalopathy                                  | 1 | 8-7-2013 17:43 |
| 2551 Stroke | G672-1  | Hypertensive crisis                                          | 1 | 8-7-2013 17:43 |
| 2551 Stroke | G673    | Cerebral aneurysm, nonruptured                               | 1 | 8-7-2013 17:43 |
| 2551 Stroke | G673-99 | Cerebral aneurysm-non ruptured                               | 1 | 8-7-2013 17:43 |
| 2551 Stroke | G6730   | Dissection of cerebral arteries, nonruptured                 | 1 | 8-7-2013 17:43 |
| 2551 Stroke | G6731   | Carotico-cavernous sinus fistula                             | 1 | 8-7-2013 17:43 |
| 2551 Stroke | G6732   | Carotid artery dissection                                    | 1 | 8-7-2013 17:43 |
| 2551 Stroke | G6733   | Vertebral artery dissection                                  | 1 | 8-7-2013 17:43 |
| 2551 Stroke | G674    | Cerebral arteritis                                           | 1 | 8-7-2013 17:43 |
| 2551 Stroke | G6740   | Cerebral amyloid angiopathy                                  | 1 | 8-7-2013 17:43 |
| 2551 Stroke | G675    | Moyamoya disease                                             | 1 | 8-7-2013 17:43 |
| 2551 Stroke | G676    | Nonpyogenic venous sinus thrombosis                          | 1 | 8-7-2013 17:43 |
| 2551 Stroke | G6760   | Cereb infarct due cerebral venous thrombosis, nonpyogenic    | 1 | 8-7-2013 17:43 |
| 2551 Stroke | G677    | Occlusion/stenosis cerebral arts not result cerebral infarct | 1 | 8-7-2013 17:43 |
| 2551 Stroke | G6770   | Occlusion and stenosis of middle cerebral artery             | 1 | 8-7-2013 17:43 |
| 2551 Stroke | G6771   | Occlusion and stenosis of anterior cerebral artery           | 1 | 8-7-2013 17:43 |
| 2551 Stroke | G6772   | Occlusion and stenosis of posterior cerebral artery          | 1 | 8-7-2013 17:43 |
| 2551 Stroke | G6773   | Occlusion and stenosis of cerebellar arteries                | 1 | 8-7-2013 17:43 |
| 2551 Stroke | G6774   | Occlusion+stenosis of multiple and bilat cerebral arteries   | 1 | 8-7-2013 17:43 |
| 2551 Stroke | G678    | Cereb autosom dominant arteriop subcort infarcts leukoenceph | 1 | 8-7-2013 17:43 |
| 2551 Stroke | G679    | Small vessel cerebrovascular disease                         | 1 | 8-7-2013 17:43 |
| 2551 Stroke | G67A    | Cerebral vein thrombosis                                     | 1 | 8-7-2013 17:43 |
| 2551 Stroke | G67y    | Other cerebrovascular disease OS                             | 1 | 8-7-2013 17:43 |
| 2551 Stroke | G67z    | Other cerebrovascular disease NOS                            | 1 | 8-7-2013 17:43 |
| 2551 Stroke | G68     | Late effects of cerebrovascular disease                      | 1 | 8-7-2013 17:43 |
| 2551 Stroke | G68-99  | Cerebrovasc. dis. late effects                               | 1 | 8-7-2013 17:43 |
| 2551 Stroke | G680    | Sequelae of subarachnoid haemorrhage                         | 1 | 8-7-2013 17:43 |
| 2551 Stroke | G681    | Sequelae of intracerebral haemorrhage                        | 1 | 8-7-2013 17:43 |
| 2551 Stroke | G682    | Sequelae of other nontraumatic intracranial haemorrhage      | 1 | 8-7-2013 17:43 |
| 2551 Stroke | G683    | Sequelae of cerebral infarction                              | 1 | 8-7-2013 17:43 |
| 2551 Stroke | G68W    | Sequelae/other + unspecified cerebrovascular diseases        | 1 | 8-7-2013 17:43 |
| 2551 Stroke | G68X    | Sequelae of stroke,not specfd as h'morrhage or infarction    | 1 | 8-7-2013 17:43 |
| 2551 Stroke | G6W     | Cereb infarct due unsp occlus/stenos precerebr arteries      | 1 | 8-7-2013 17:43 |
| 2551 Stroke | G6X     | Cerebrl infarctn due/unspcf occlusn or sten/cerebrl arts     | 1 | 8-7-2013 17:43 |

|             |        |                                                             |   |                |
|-------------|--------|-------------------------------------------------------------|---|----------------|
| 2551 Stroke | G6y    | Other specified cerebrovascular disease                     | 1 | 8-7-2013 17:43 |
| 2551 Stroke | G6z    | Cerebrovascular disease NOS                                 | 1 | 8-7-2013 17:43 |
| 2551 Stroke | Gyu62  | [X]Other intracerebral haemorrhage                          | 1 | 8-7-2013 17:43 |
| 2551 Stroke | Gyu63  | [X]Cerebrl infarctn due/unspcf occlusn or sten/cerebrl artr | 1 | 8-7-2013 17:43 |
| 2551 Stroke | Gyu64  | [X]Other cerebral infarction                                | 1 | 8-7-2013 17:43 |
| 2551 Stroke | Gyu6F  | [X]Intracerebral haemorrhage in hemisphere, unspecified     | 1 | 8-7-2013 17:43 |
| 2551 Stroke | Gyu6G  | [X]Cereb infarct due unsp occlus/stenos precerebr arteries  | 1 | 8-7-2013 17:43 |
| 2551 Stroke | L440-1 | CVA - cerebrovascular accident in the puerperium            | 1 | 8-7-2013 17:43 |
| 2551 Stroke | L440-2 | Stroke in the puerperium                                    | 1 | 8-7-2013 17:43 |

| Group Id | Group Name    | ReadTerm | ReadDesc                                                   | Group Version | Date Of Version |
|----------|---------------|----------|------------------------------------------------------------|---------------|-----------------|
| 2552     | Heart failure | 14A6     | H/O: heart failure                                         | 1             | 8-7-2013 18:07  |
| 2552     | Heart failure | 1O1      | Heart failure confirmed                                    | 1             | 8-7-2013 18:07  |
| 2552     | Heart failure | 388D     | New York Heart Assoc classification heart failure symptoms | 1             | 8-7-2013 18:07  |
| 2552     | Heart failure | 8B29     | Cardiac failure therapy                                    | 1             | 8-7-2013 18:07  |
| 2552     | Heart failure | 8H2S     | Admit heart failure emergency                              | 1             | 8-7-2013 18:07  |
| 2552     | Heart failure | 8HBE     | Heart failure follow-up                                    | 1             | 8-7-2013 18:07  |
| 2552     | Heart failure | G58      | Heart failure                                              | 1             | 8-7-2013 18:07  |
| 2552     | Heart failure | G58-1    | Cardiac failure                                            | 1             | 8-7-2013 18:07  |
| 2552     | Heart failure | G580     | Congestive heart failure                                   | 1             | 8-7-2013 18:07  |
| 2552     | Heart failure | G580-1   | Congestive cardiac failure                                 | 1             | 8-7-2013 18:07  |
| 2552     | Heart failure | G580-2   | Right heart failure                                        | 1             | 8-7-2013 18:07  |
| 2552     | Heart failure | G580-3   | Right ventricular failure                                  | 1             | 8-7-2013 18:07  |
| 2552     | Heart failure | G580-4   | Biventricular failure                                      | 1             | 8-7-2013 18:07  |
| 2552     | Heart failure | G5800    | Acute congestive heart failure                             | 1             | 8-7-2013 18:07  |
| 2552     | Heart failure | G5801    | Chronic congestive heart failure                           | 1             | 8-7-2013 18:07  |
| 2552     | Heart failure | G5802    | Decompensated cardiac failure                              | 1             | 8-7-2013 18:07  |
| 2552     | Heart failure | G5803    | Compensated cardiac failure                                | 1             | 8-7-2013 18:07  |
| 2552     | Heart failure | G5804    | Congestive heart failure due to valvular disease           | 1             | 8-7-2013 18:07  |
| 2552     | Heart failure | G581     | Left ventricular failure                                   | 1             | 8-7-2013 18:07  |
| 2552     | Heart failure | G581-3   | Impaired left ventricular function                         | 1             | 8-7-2013 18:07  |
| 2552     | Heart failure | G5810    | Acute left ventricular failure                             | 1             | 8-7-2013 18:07  |
| 2552     | Heart failure | G582     | Acute heart failure                                        | 1             | 8-7-2013 18:07  |
| 2552     | Heart failure | G58z     | Heart failure NOS                                          | 1             | 8-7-2013 18:07  |
| 2552     | Heart failure | G58z-2   | Cardiac failure NOS                                        | 1             | 8-7-2013 18:07  |
| 2552     | Heart failure | SP111-1  | Heart failure as a complication of care                    | 1             | 8-7-2013 18:07  |

| Group Id | Group Name                  | ReadTerm  | ReadDesc                                                    | Group Version | Date Of Version |
|----------|-----------------------------|-----------|-------------------------------------------------------------|---------------|-----------------|
| 2553     | Peripheral vascular disease | 12CY      | FH: peripheral vascular disease                             | 1             | 12-7-2013 13:45 |
| 2553     | Peripheral vascular disease | 14NB      | H/O: Peripheral vascular disease procedure                  | 1             | 12-7-2013 13:45 |
| 2553     | Peripheral vascular disease | EMISNQFH9 | FH: Peripheral vascular disease                             | 1             | 12-7-2013 13:45 |
| 2553     | Peripheral vascular disease | G73       | Other peripheral vascular disease                           | 1             | 12-7-2013 13:45 |
| 2553     | Peripheral vascular disease | G73-1     | Peripheral ischaemic vascular disease                       | 1             | 12-7-2013 13:45 |
| 2553     | Peripheral vascular disease | G734      | Peripheral arterial disease                                 | 1             | 12-7-2013 13:45 |
| 2553     | Peripheral vascular disease | G73y      | Other specified peripheral vascular disease                 | 1             | 12-7-2013 13:45 |
| 2553     | Peripheral vascular disease | G73yz     | Other specified peripheral vascular disease NOS             | 1             | 12-7-2013 13:45 |
| 2553     | Peripheral vascular disease | G73z      | Peripheral vascular disease NOS                             | 1             | 12-7-2013 13:45 |
| 2553     | Peripheral vascular disease | G73zz     | Peripheral vascular disease NOS                             | 1             | 12-7-2013 13:45 |
| 2553     | Peripheral vascular disease | G742z     | Peripheral arterial embolism and thrombosis NOS             | 1             | 12-7-2013 13:45 |
| 2553     | Peripheral vascular disease | G742z-99  | Peripheral arterial embolism                                | 1             | 12-7-2013 13:45 |
| 2553     | Peripheral vascular disease | Gyu74     | [X]Other specified peripheral vascular diseases             | 1             | 12-7-2013 13:45 |
| 2553     | Peripheral vascular disease | HNG0172   | [RFC] Peripheral vascular disease                           | 1             | 12-7-2013 13:45 |
| 2553     | Peripheral vascular disease | P76       | Other peripheral vascular system anomalies                  | 1             | 12-7-2013 13:45 |
| 2553     | Peripheral vascular disease | P76y      | Congenital anomaly of peripheral vascular system OS         | 1             | 12-7-2013 13:45 |
| 2553     | Peripheral vascular disease | P76yz     | Other congenital anomaly of peripheral vascular system NOS  | 1             | 12-7-2013 13:45 |
| 2553     | Peripheral vascular disease | P76z      | Peripheral vascular system anomaly NOS                      | 1             | 12-7-2013 13:45 |
| 2553     | Peripheral vascular disease | Pyu2B     | [X]Oth specified cong malform of peripheral vascular system | 1             | 12-7-2013 13:45 |
| 2553     | Peripheral vascular disease | SP12      | Peripheral vascular complications of care                   | 1             | 12-7-2013 13:45 |
| 2553     | Peripheral vascular disease | SP12z     | Peripheral vascular complications of care NOS               | 1             | 12-7-2013 13:45 |

| Group Id | Group Name         | ReadTerm   | ReadDesc                                                     | Group Version | Date Of Version |
|----------|--------------------|------------|--------------------------------------------------------------|---------------|-----------------|
| 2555     | Cardiac arrhythmia | 14AD       | H/O ventricular fibrillation                                 | 1             | 12-7-2013 14:37 |
| 2555     | Cardiac arrhythmia | 14AN       | H/O: atrial fibrillation                                     | 1             | 12-7-2013 14:37 |
| 2555     | Cardiac arrhythmia | 2426       | O/E - pulse rate tachycardia                                 | 1             | 12-7-2013 14:37 |
| 2555     | Cardiac arrhythmia | 2426-1     | O/E - tachycardia                                            | 1             | 12-7-2013 14:37 |
| 2555     | Cardiac arrhythmia | 326        | ECG: ectopic beats                                           | 1             | 12-7-2013 14:37 |
| 2555     | Cardiac arrhythmia | 326Z       | ECG: ectopic beats NOS                                       | 1             | 12-7-2013 14:37 |
| 2555     | Cardiac arrhythmia | 327        | ECG: supraventricular arrhythmia                             | 1             | 12-7-2013 14:37 |
| 2555     | Cardiac arrhythmia | 3272       | ECG: atrial fibrillation                                     | 1             | 12-7-2013 14:37 |
| 2555     | Cardiac arrhythmia | 3273       | ECG: atrial flutter                                          | 1             | 12-7-2013 14:37 |
| 2555     | Cardiac arrhythmia | 328        | ECG: ventricular arrhythmia                                  | 1             | 12-7-2013 14:37 |
| 2555     | Cardiac arrhythmia | 3282       | ECG: ventricular tachycardia                                 | 1             | 12-7-2013 14:37 |
| 2555     | Cardiac arrhythmia | 3283       | ECG: ventricular fibrillation                                | 1             | 12-7-2013 14:37 |
| 2555     | Cardiac arrhythmia | 328Z       | ECG: ventricular arrhythmia NOS                              | 1             | 12-7-2013 14:37 |
| 2555     | Cardiac arrhythmia | 7936A      | Implant intravenous pacemaker for atrial fibrillation        | 1             | 12-7-2013 14:37 |
| 2555     | Cardiac arrhythmia | 793M1      | Perc transluminal ablation of atrial wall for atrial flutter | 1             | 12-7-2013 14:37 |
| 2555     | Cardiac arrhythmia | 793M3      | Perc translum ablat conduct sys heart for atrial flutter NEC | 1             | 12-7-2013 14:37 |
| 2555     | Cardiac arrhythmia | 8CMW2      | Atrial fibrillation care pathway                             | 1             | 12-7-2013 14:37 |
| 2555     | Cardiac arrhythmia | 8HTy       | Referral to atrial fibrillation clinic                       | 1             | 12-7-2013 14:37 |
| 2555     | Cardiac arrhythmia | 9hF        | Exception reporting: atrial fibrillation quality indicators  | 1             | 12-7-2013 14:37 |
| 2555     | Cardiac arrhythmia | 9hF1       | Excepted from atrial fibrillation qual indic: Inform dissent | 1             | 12-7-2013 14:37 |
| 2555     | Cardiac arrhythmia | EMISNQAT23 | Atrial fibrillation clinical pathway protocol followed       | 1             | 12-7-2013 14:37 |
| 2555     | Cardiac arrhythmia | EMISNQAT24 | Atrial fibrillation clinical pathway protocol not followed   | 1             | 12-7-2013 14:37 |
| 2555     | Cardiac arrhythmia | G570       | Paroxysmal supraventricular tachycardia                      | 1             | 12-7-2013 14:37 |
| 2555     | Cardiac arrhythmia | G570-99    | Parox. supravent. tachycardia                                | 1             | 12-7-2013 14:37 |
| 2555     | Cardiac arrhythmia | G5700      | Paroxysmal atrial tachycardia                                | 1             | 12-7-2013 14:37 |
| 2555     | Cardiac arrhythmia | G5701      | Paroxysmal atrioventricular tachycardia                      | 1             | 12-7-2013 14:37 |
| 2555     | Cardiac arrhythmia | G5702      | Paroxysmal junctional tachycardia                            | 1             | 12-7-2013 14:37 |
| 2555     | Cardiac arrhythmia | G5703      | Paroxysmal nodal tachycardia                                 | 1             | 12-7-2013 14:37 |
| 2555     | Cardiac arrhythmia | G570z      | Paroxysmal supraventricular tachycardia NOS                  | 1             | 12-7-2013 14:37 |
| 2555     | Cardiac arrhythmia | G571       | Paroxysmal ventricular tachycardia                           | 1             | 12-7-2013 14:37 |
| 2555     | Cardiac arrhythmia | G571-1     | Ventricular tachycardia                                      | 1             | 12-7-2013 14:37 |
| 2555     | Cardiac arrhythmia | G572       | Paroxysmal tachycardia unspecified                           | 1             | 12-7-2013 14:37 |
| 2555     | Cardiac arrhythmia | G5720      | Essential paroxysmal tachycardia                             | 1             | 12-7-2013 14:37 |
| 2555     | Cardiac arrhythmia | G572z      | Paroxysmal tachycardia NOS                                   | 1             | 12-7-2013 14:37 |
| 2555     | Cardiac arrhythmia | G573       | Atrial fibrillation and flutter                              | 1             | 12-7-2013 14:37 |
| 2555     | Cardiac arrhythmia | G5730      | Atrial fibrillation                                          | 1             | 12-7-2013 14:37 |
| 2555     | Cardiac arrhythmia | G5731      | Atrial flutter                                               | 1             | 12-7-2013 14:37 |
| 2555     | Cardiac arrhythmia | G5732      | Paroxysmal atrial fibrillation                               | 1             | 12-7-2013 14:37 |
| 2555     | Cardiac arrhythmia | G5733      | Non-rheumatic atrial fibrillation                            | 1             | 12-7-2013 14:37 |
| 2555     | Cardiac arrhythmia | G5734      | Permanent atrial fibrillation                                | 1             | 12-7-2013 14:37 |
| 2555     | Cardiac arrhythmia | G5735      | Persistent atrial fibrillation                               | 1             | 12-7-2013 14:37 |
| 2555     | Cardiac arrhythmia | G573z      | Atrial fibrillation and flutter NOS                          | 1             | 12-7-2013 14:37 |
| 2555     | Cardiac arrhythmia | G574       | Ventricular fibrillation and flutter                         | 1             | 12-7-2013 14:37 |
| 2555     | Cardiac arrhythmia | G5740      | Ventricular fibrillation                                     | 1             | 12-7-2013 14:37 |
| 2555     | Cardiac arrhythmia | G5740-1    | Cardiac arrest-ventricular fibrillation                      | 1             | 12-7-2013 14:37 |
| 2555     | Cardiac arrhythmia | G5741      | Ventricular flutter                                          | 1             | 12-7-2013 14:37 |
| 2555     | Cardiac arrhythmia | G574z      | Ventricular fibrillation and flutter NOS                     | 1             | 12-7-2013 14:37 |
| 2555     | Cardiac arrhythmia | G576       | Ectopic beats                                                | 1             | 12-7-2013 14:37 |
| 2555     | Cardiac arrhythmia | G5760      | Ectopic beats unspecified                                    | 1             | 12-7-2013 14:37 |
| 2555     | Cardiac arrhythmia | G5761      | Supraventricular ectopic beats                               | 1             | 12-7-2013 14:37 |
| 2555     | Cardiac arrhythmia | G5762      | Ventricular ectopic beats                                    | 1             | 12-7-2013 14:37 |
| 2555     | Cardiac arrhythmia | G576z      | Ectopic beats NOS                                            | 1             | 12-7-2013 14:37 |
| 2555     | Cardiac arrhythmia | G577       | Sinus arrhythmia                                             | 1             | 12-7-2013 14:37 |
| 2555     | Cardiac arrhythmia | G57y7      | Sinus tachycardia                                            | 1             | 12-7-2013 14:37 |
| 2555     | Cardiac arrhythmia | G57y9      | Supraventricular tachycardia NOS                             | 1             | 12-7-2013 14:37 |
| 2555     | Cardiac arrhythmia | PCSDT1EC3  | Ectopic beats - benign, at                                   | 1             | 12-7-2013 14:37 |

| Group Id | Group Name | ReadTerm | ReadDesc                                                      | Group Version | Date Of Version |
|----------|------------|----------|---------------------------------------------------------------|---------------|-----------------|
| 2536     | Depression | 1B17     | Depressed                                                     | 3             | 8-7-2013 16:19  |
| 2536     | Depression | 1B17-1   | C/O - feeling depressed                                       | 3             | 8-7-2013 16:19  |
| 2536     | Depression | 1B1U     | Symptoms of depression                                        | 3             | 8-7-2013 16:19  |
| 2536     | Depression | 1B1U-1   | Depressive symptoms                                           | 3             | 8-7-2013 16:19  |
| 2536     | Depression | 1BQ      | Loss of capacity for enjoyment                                | 3             | 8-7-2013 16:19  |
| 2536     | Depression | 1BT      | Depressed mood                                                | 3             | 8-7-2013 16:19  |
| 2536     | Depression | 1BT-1    | Low mood                                                      | 3             | 8-7-2013 16:19  |
| 2536     | Depression | 1BU      | Loss of hope for the future                                   | 3             | 8-7-2013 16:19  |
| 2536     | Depression | 2257     | O/E - depressed                                               | 3             | 8-7-2013 16:19  |
| 2536     | Depression | 62T1     | Puerperal depression                                          | 3             | 8-7-2013 16:19  |
| 2536     | Depression | E02y3    | Drug-induced depressive state                                 | 3             | 8-7-2013 16:19  |
| 2536     | Depression | E112     | Single major depressive episode                               | 3             | 8-7-2013 16:19  |
| 2536     | Depression | E112-1   | Agitated depression                                           | 3             | 8-7-2013 16:19  |
| 2536     | Depression | E112-2   | Endogenous depression first episode                           | 3             | 8-7-2013 16:19  |
| 2536     | Depression | E112-3   | Endogenous depression first episode                           | 3             | 8-7-2013 16:19  |
| 2536     | Depression | E112-4   | Endogenous depression                                         | 3             | 8-7-2013 16:19  |
| 2536     | Depression | E1120    | Single major depressive episode, unspecified                  | 3             | 8-7-2013 16:19  |
| 2536     | Depression | E1121    | Single major depressive episode, mild                         | 3             | 8-7-2013 16:19  |
| 2536     | Depression | E1122    | Single major depressive episode, moderate                     | 3             | 8-7-2013 16:19  |
| 2536     | Depression | E1123    | Single major depressive episode, severe, without psychosis    | 3             | 8-7-2013 16:19  |
| 2536     | Depression | E1124    | Single major depressive episode, severe, with psychosis       | 3             | 8-7-2013 16:19  |
| 2536     | Depression | E1125    | Single major depressive episode, partial or unspec remission  | 3             | 8-7-2013 16:19  |
| 2536     | Depression | E112z    | Single major depressive episode NOS                           | 3             | 8-7-2013 16:19  |
| 2536     | Depression | E113     | Recurrent major depressive episode                            | 3             | 8-7-2013 16:19  |
| 2536     | Depression | E113-1   | Endogenous depression - recurrent                             | 3             | 8-7-2013 16:19  |
| 2536     | Depression | E1130    | Recurrent major depressive episodes, unspecified              | 3             | 8-7-2013 16:19  |
| 2536     | Depression | E1131    | Recurrent major depressive episodes, mild                     | 3             | 8-7-2013 16:19  |
| 2536     | Depression | E1132    | Recurrent major depressive episodes, moderate                 | 3             | 8-7-2013 16:19  |
| 2536     | Depression | E1133    | Recurrent major depressive episodes, severe, no psychosis     | 3             | 8-7-2013 16:19  |
| 2536     | Depression | E1134    | Recurrent major depressive episodes, severe, with psychosis   | 3             | 8-7-2013 16:19  |
| 2536     | Depression | E1135    | Recurrent major depressive episodes, partial/unspec remission | 3             | 8-7-2013 16:19  |
| 2536     | Depression | E1137    | Recurrent depression                                          | 3             | 8-7-2013 16:19  |
| 2536     | Depression | E113z    | Recurrent major depressive episode NOS                        | 3             | 8-7-2013 16:19  |
| 2536     | Depression | E118     | Seasonal affective disorder                                   | 3             | 8-7-2013 16:19  |
| 2536     | Depression | E11y2    | Atypical depressive disorder                                  | 3             | 8-7-2013 16:19  |
| 2536     | Depression | E11z2    | Masked depression                                             | 3             | 8-7-2013 16:19  |
| 2536     | Depression | E130     | Reactive depressive psychosis                                 | 3             | 8-7-2013 16:19  |
| 2536     | Depression | E130-1   | Psychotic reactive depression                                 | 3             | 8-7-2013 16:19  |
| 2536     | Depression | E135     | Agitated depression                                           | 3             | 8-7-2013 16:19  |
| 2536     | Depression | E2003    | Anxiety with depression                                       | 3             | 8-7-2013 16:19  |
| 2536     | Depression | E204     | Neurotic depression reactive type                             | 3             | 8-7-2013 16:19  |
| 2536     | Depression | E204-1   | Postnatal depression                                          | 3             | 8-7-2013 16:19  |
| 2536     | Depression | E2112    | Depressive personality disorder                               | 3             | 8-7-2013 16:19  |
| 2536     | Depression | E290     | Brief depressive reaction                                     | 3             | 8-7-2013 16:19  |
| 2536     | Depression | E290z    | Brief depressive reaction NOS                                 | 3             | 8-7-2013 16:19  |
| 2536     | Depression | E291     | Prolonged depressive reaction                                 | 3             | 8-7-2013 16:19  |
| 2536     | Depression | E2B      | Depressive disorder NEC                                       | 3             | 8-7-2013 16:19  |
| 2536     | Depression | E2B0     | Postviral depression                                          | 3             | 8-7-2013 16:19  |
| 2536     | Depression | E2B1     | Chronic depression                                            | 3             | 8-7-2013 16:19  |
| 2536     | Depression | Eu32     | [X]Depressive episode                                         | 3             | 8-7-2013 16:19  |
| 2536     | Depression | Eu32-1   | [X]Single episode of depressive reaction                      | 3             | 8-7-2013 16:19  |
| 2536     | Depression | Eu32-2   | [X]Single episode of psychogenic depression                   | 3             | 8-7-2013 16:19  |
| 2536     | Depression | Eu32-3   | [X]Single episode of reactive depression                      | 3             | 8-7-2013 16:19  |
| 2536     | Depression | Eu320    | [X]Mild depressive episode                                    | 3             | 8-7-2013 16:19  |
| 2536     | Depression | Eu321    | [X]Moderate depressive episode                                | 3             | 8-7-2013 16:19  |
| 2536     | Depression | Eu322    | [X]Severe depressive episode without psychotic symptoms       | 3             | 8-7-2013 16:19  |
| 2536     | Depression | Eu322-1  | [X]Single episode agitated depressn w/out psychotic symptoms  | 3             | 8-7-2013 16:19  |
| 2536     | Depression | Eu322-2  | [X]Single episode major depression w/out psychotic symptoms   | 3             | 8-7-2013 16:19  |
| 2536     | Depression | Eu322-3  | [X]Single episode vital depression w/out psychotic symptoms   | 3             | 8-7-2013 16:19  |
| 2536     | Depression | Eu323    | [X]Severe depressive episode with psychotic symptoms          | 3             | 8-7-2013 16:19  |
| 2536     | Depression | Eu323-1  | [X]Single episode of major depression and psychotic symptoms  | 3             | 8-7-2013 16:19  |
| 2536     | Depression | Eu323-2  | [X]Single episode of psychogenic depressive psychosis         | 3             | 8-7-2013 16:19  |
| 2536     | Depression | Eu323-3  | [X]Single episode of psychotic depression                     | 3             | 8-7-2013 16:19  |
| 2536     | Depression | Eu323-4  | [X]Single episode of reactive depressive psychosis            | 3             | 8-7-2013 16:19  |
| 2536     | Depression | Eu324    | [X]Mild depression                                            | 3             | 8-7-2013 16:19  |
| 2536     | Depression | Eu325    | [X]Major depression, mild                                     | 3             | 8-7-2013 16:19  |
| 2536     | Depression | Eu326    | [X]Major depression, moderately severe                        | 3             | 8-7-2013 16:19  |
| 2536     | Depression | Eu327    | [X]Major depression, severe without psychotic symptoms        | 3             | 8-7-2013 16:19  |
| 2536     | Depression | Eu328    | [X]Major depression, severe with psychotic symptoms           | 3             | 8-7-2013 16:19  |
| 2536     | Depression | Eu32y    | [X]Other depressive episodes                                  | 3             | 8-7-2013 16:19  |
| 2536     | Depression | Eu32y-1  | [X]Atypical depression                                        | 3             | 8-7-2013 16:19  |
| 2536     | Depression | Eu32y-2  | [X]Single episode of masked depression NOS                    | 3             | 8-7-2013 16:19  |
| 2536     | Depression | Eu32z    | [X]Depressive episode, unspecified                            | 3             | 8-7-2013 16:19  |

|                 |         |                                                              |   |                |
|-----------------|---------|--------------------------------------------------------------|---|----------------|
| 2536 Depression | Eu32z-1 | [X]Depression NOS                                            | 3 | 8-7-2013 16:19 |
| 2536 Depression | Eu32z-2 | [X]Depressive disorder NOS                                   | 3 | 8-7-2013 16:19 |
| 2536 Depression | Eu32z-3 | [X]Prolonged single episode of reactive depression           | 3 | 8-7-2013 16:19 |
| 2536 Depression | Eu32z-4 | [X] Reactive depression NOS                                  | 3 | 8-7-2013 16:19 |
| 2536 Depression | Eu33    | [X]Recurrent depressive disorder                             | 3 | 8-7-2013 16:19 |
| 2536 Depression | Eu33-1  | [X]Recurrent episodes of depressive reaction                 | 3 | 8-7-2013 16:19 |
| 2536 Depression | Eu33-2  | [X]Recurrent episodes of psychogenic depression              | 3 | 8-7-2013 16:19 |
| 2536 Depression | Eu33-3  | [X]Recurrent episodes of reactive depression                 | 3 | 8-7-2013 16:19 |
| 2536 Depression | Eu33-4  | [X]Seasonal depressive disorder                              | 3 | 8-7-2013 16:19 |
| 2536 Depression | Eu33-5  | [X]SAD - Seasonal affective disorder                         | 3 | 8-7-2013 16:19 |
| 2536 Depression | Eu330   | [X]Recurrent depressive disorder, current episode mild       | 3 | 8-7-2013 16:19 |
| 2536 Depression | Eu331   | [X]Recurrent depressive disorder, current episode moderate   | 3 | 8-7-2013 16:19 |
| 2536 Depression | Eu332   | [X]Recurr depress disorder cur epi severe without psyc sympt | 3 | 8-7-2013 16:19 |
| 2536 Depression | Eu332-1 | [X]Endogenous depression without psychotic symptoms          | 3 | 8-7-2013 16:19 |
| 2536 Depression | Eu332-2 | [X]Major depression, recurrent without psychotic symptoms    | 3 | 8-7-2013 16:19 |
| 2536 Depression | Eu332-3 | [X]Manic-depress psychosis,depressed,no psychotic symptoms   | 3 | 8-7-2013 16:19 |
| 2536 Depression | Eu332-4 | [X]Vital depression, recurrent without psychotic symptoms    | 3 | 8-7-2013 16:19 |
| 2536 Depression | Eu333   | [X]Recurrent depress disorder cur epi severe with psyc symp  | 3 | 8-7-2013 16:19 |
| 2536 Depression | Eu333-1 | [X]Endogenous depression with psychotic symptoms             | 3 | 8-7-2013 16:19 |
| 2536 Depression | Eu333-2 | [X]Manic-depress psychosis,depressed type+psychotic symptoms | 3 | 8-7-2013 16:19 |
| 2536 Depression | Eu333-3 | [X]Recurr severe episodes/major depression+psychotic symptom | 3 | 8-7-2013 16:19 |
| 2536 Depression | Eu333-4 | [X]Recurr severe episodes/psychogenic depressive psychosis   | 3 | 8-7-2013 16:19 |
| 2536 Depression | Eu333-5 | [X]Recurrent severe episodes of psychotic depression         | 3 | 8-7-2013 16:19 |
| 2536 Depression | Eu333-6 | [X]Recurrent severe episodes/reactive depressive psychosis   | 3 | 8-7-2013 16:19 |
| 2536 Depression | Eu33y   | [X]Other recurrent depressive disorders                      | 3 | 8-7-2013 16:19 |
| 2536 Depression | Eu33z   | [X]Recurrent depressive disorder, unspecified                | 3 | 8-7-2013 16:19 |
| 2536 Depression | Eu33z-1 | [X]Monopolar depression NOS                                  | 3 | 8-7-2013 16:19 |
| 2536 Depression | Eu34    | [X]Persistent mood affective disorders                       | 3 | 8-7-2013 16:19 |
| 2536 Depression | Eu341   | [X]Dysthymia                                                 | 3 | 8-7-2013 16:19 |
| 2536 Depression | Eu341-1 | [X]Depressive neurosis                                       | 3 | 8-7-2013 16:19 |
| 2536 Depression | Eu341-3 | [X]Neurotic depression                                       | 3 | 8-7-2013 16:19 |
| 2536 Depression | Eu341-4 | [X]Persistant anxiety depression                             | 3 | 8-7-2013 16:19 |
| 2536 Depression | Eu34y   | [X]Other persistent mood affective disorders                 | 3 | 8-7-2013 16:19 |
| 2536 Depression | Eu34z   | [X]Persistent mood affective disorder, unspecified           | 3 | 8-7-2013 16:19 |
| 2536 Depression | Eu3y1-1 | [X]Recurrent brief depressive episodes                       | 3 | 8-7-2013 16:19 |
| 2536 Depression | Eu412   | [X]Mixed anxiety and depressive disorder                     | 3 | 8-7-2013 16:19 |
| 2536 Depression | Eu412-1 | [X]Mild anxiety depression                                   | 3 | 8-7-2013 16:19 |
| 2536 Depression | Eu530-1 | [X]Postnatal depression NOS                                  | 3 | 8-7-2013 16:19 |
| 2536 Depression | Eu530-2 | [X]Postpartum depression NOS                                 | 3 | 8-7-2013 16:19 |
| 2536 Depression | R007z-3 | [D]Postoperative depression                                  | 3 | 8-7-2013 16:19 |



| Group Id | Group Name | ReadTerm | ReadDesc                                                     | Group Version | Date Of Version |
|----------|------------|----------|--------------------------------------------------------------|---------------|-----------------|
| 2549     | Self-harm  | SL-4     | Overdose of biological substance                             | 1             | 8-7-2013 16:47  |
| 2549     | Self-harm  | SL-5     | Overdose of drug                                             | 1             | 8-7-2013 16:47  |
| 2549     | Self-harm  | SLHz     | Drug and medicament poisoning NOS                            | 1             | 8-7-2013 16:47  |
| 2549     | Self-harm  | TK       | Suicide and selfinflicted injury                             | 1             | 8-7-2013 16:47  |
| 2549     | Self-harm  | TK-1     | Cause of overdose - deliberate                               | 1             | 8-7-2013 16:47  |
| 2549     | Self-harm  | TK-2     | Injury - self-inflicted                                      | 1             | 8-7-2013 16:47  |
| 2549     | Self-harm  | TK-3     | Poisoning - self-inflicted                                   | 1             | 8-7-2013 16:47  |
| 2549     | Self-harm  | TK-4     | Suicide and self harm                                        | 1             | 8-7-2013 16:47  |
| 2549     | Self-harm  | TK-5     | Attempted suicide                                            | 1             | 8-7-2013 16:47  |
| 2549     | Self-harm  | TK-7     | Para-suicide                                                 | 1             | 8-7-2013 16:47  |
| 2549     | Self-harm  | TK-97    | Suicide - NOS                                                | 1             | 8-7-2013 16:47  |
| 2549     | Self-harm  | TK-98    | Attempt suicide - NOS                                        | 1             | 8-7-2013 16:47  |
| 2549     | Self-harm  | TK-99    | Suicide - successful                                         | 1             | 8-7-2013 16:47  |
| 2549     | Self-harm  | TK0      | Suicide + selfinflicted poisoning by solid/liquid substances | 1             | 8-7-2013 16:47  |
| 2549     | Self-harm  | TK00     | Suicide + selfinflicted poisoning by analgesic/antipyretic   | 1             | 8-7-2013 16:47  |
| 2549     | Self-harm  | TK01     | Suicide + selfinflicted poisoning by barbiturates            | 1             | 8-7-2013 16:47  |
| 2549     | Self-harm  | TK010    | Suicide and self inflicted injury by Amylobarbitone          | 1             | 8-7-2013 16:47  |
| 2549     | Self-harm  | TK010-1  | Suicide and self inflicted injury by amobarbital             | 1             | 8-7-2013 16:47  |
| 2549     | Self-harm  | TK011    | Suicide and self inflicted injury by Barbitone               | 1             | 8-7-2013 16:47  |
| 2549     | Self-harm  | TK012    | Suicide and self inflicted injury by Butabarbitone           | 1             | 8-7-2013 16:47  |
| 2549     | Self-harm  | TK013    | Suicide and self inflicted injury by Pentobarbitone          | 1             | 8-7-2013 16:47  |
| 2549     | Self-harm  | TK014    | Suicide and self inflicted injury by Phenobarbitone          | 1             | 8-7-2013 16:47  |
| 2549     | Self-harm  | TK014-1  | Suicide and self inflicted injury by phenobarbital           | 1             | 8-7-2013 16:47  |
| 2549     | Self-harm  | TK015    | Suicide and self inflicted injury by Quinalbarbitone         | 1             | 8-7-2013 16:47  |
| 2549     | Self-harm  | TK015-1  | Suicide and self inflicted injury by secobarbital            | 1             | 8-7-2013 16:47  |
| 2549     | Self-harm  | TK01z    | Suicide and self inflicted injury by barbiturates            | 1             | 8-7-2013 16:47  |
| 2549     | Self-harm  | TK02     | Suicide + selfinflicted poisoning by oth sedatives/hypnotics | 1             | 8-7-2013 16:47  |
| 2549     | Self-harm  | TK03     | Suicide + selfinflicted poisoning tranquilliser/psychotropic | 1             | 8-7-2013 16:47  |
| 2549     | Self-harm  | TK04     | Suicide + selfinflicted poisoning by other drugs/medicines   | 1             | 8-7-2013 16:47  |
| 2549     | Self-harm  | TK05     | Suicide + selfinflicted poisoning by drug or medicine NOS    | 1             | 8-7-2013 16:47  |
| 2549     | Self-harm  | TK05-98  | Suicide - drug overdose                                      | 1             | 8-7-2013 16:47  |
| 2549     | Self-harm  | TK05-99  | Attempt suicide -drug overdose                               | 1             | 8-7-2013 16:47  |
| 2549     | Self-harm  | TK06     | Suicide + selfinflicted poisoning by agricultural chemical   | 1             | 8-7-2013 16:47  |
| 2549     | Self-harm  | TK07     | Suicide + selfinflicted poisoning by corrosive/caustic subst | 1             | 8-7-2013 16:47  |
| 2549     | Self-harm  | TK08     | Suicide + selfinflicted poisoning by arsenic + its compounds | 1             | 8-7-2013 16:47  |
| 2549     | Self-harm  | TK0z     | Suicide + selfinflicted poisoning by solid/liquid subst NOS  | 1             | 8-7-2013 16:47  |
| 2549     | Self-harm  | TK1      | Suicide + selfinflicted poisoning by gases in domestic use   | 1             | 8-7-2013 16:47  |
| 2549     | Self-harm  | TK1-98   | Suicide - domestic gas                                       | 1             | 8-7-2013 16:47  |
| 2549     | Self-harm  | TK1-99   | Attempt suicide - domestic gas                               | 1             | 8-7-2013 16:47  |
| 2549     | Self-harm  | TK10     | Suicide + selfinflicted poisoning by gas via pipeline        | 1             | 8-7-2013 16:47  |
| 2549     | Self-harm  | TK11     | Suicide + selfinflicted poisoning by liquified petrol gas    | 1             | 8-7-2013 16:47  |
| 2549     | Self-harm  | TK1y     | Suicide and selfinflicted poisoning by other utility gas     | 1             | 8-7-2013 16:47  |
| 2549     | Self-harm  | TK1z     | Suicide + selfinflicted poisoning by domestic gases NOS      | 1             | 8-7-2013 16:47  |
| 2549     | Self-harm  | TK2      | Suicide + selfinflicted poisoning by other gases and vapours | 1             | 8-7-2013 16:47  |
| 2549     | Self-harm  | TK20     | Suicide + selfinflicted poisoning by motor veh exhaust gas   | 1             | 8-7-2013 16:47  |
| 2549     | Self-harm  | TK20-98  | Suicide - car exhaust                                        | 1             | 8-7-2013 16:47  |
| 2549     | Self-harm  | TK20-99  | Attempt suicide - car exhaust                                | 1             | 8-7-2013 16:47  |
| 2549     | Self-harm  | TK21     | Suicide and selfinflicted poisoning by other carbon monoxide | 1             | 8-7-2013 16:47  |
| 2549     | Self-harm  | TK2y     | Suicide + selfinflicted poisoning by other gases and vapours | 1             | 8-7-2013 16:47  |
| 2549     | Self-harm  | TK2z     | Suicide + selfinflicted poisoning by gases and vapours NOS   | 1             | 8-7-2013 16:47  |
| 2549     | Self-harm  | TK3      | Suicide + selfinflicted injury by hang/strangulate/suffocate | 1             | 8-7-2013 16:47  |
| 2549     | Self-harm  | TK30     | Suicide and selfinflicted injury by hanging                  | 1             | 8-7-2013 16:47  |
| 2549     | Self-harm  | TK30-98  | Suicide - hanging                                            | 1             | 8-7-2013 16:47  |
| 2549     | Self-harm  | TK30-99  | Attempt suicide - hanging                                    | 1             | 8-7-2013 16:47  |
| 2549     | Self-harm  | TK31     | Suicide + selfinflicted injury by suffocation by plastic bag | 1             | 8-7-2013 16:47  |
| 2549     | Self-harm  | TK31-98  | Suicide - suffocate                                          | 1             | 8-7-2013 16:47  |
| 2549     | Self-harm  | TK31-99  | Attempt suicide - suffocate                                  | 1             | 8-7-2013 16:47  |
| 2549     | Self-harm  | TK3y     | Suicide + selfinflicted inj oth mean hang/strangle/suffocate | 1             | 8-7-2013 16:47  |
| 2549     | Self-harm  | TK3z     | Suicide + selfinflicted inj by hang/strangle/suffocate NOS   | 1             | 8-7-2013 16:47  |
| 2549     | Self-harm  | TK4      | Suicide and selfinflicted injury by drowning                 | 1             | 8-7-2013 16:47  |
| 2549     | Self-harm  | TK4-98   | Suicide - drowning                                           | 1             | 8-7-2013 16:47  |
| 2549     | Self-harm  | TK4-99   | Attempt suicide - drowning                                   | 1             | 8-7-2013 16:47  |
| 2549     | Self-harm  | TK5      | Suicide and selfinflicted injury by firearms and explosives  | 1             | 8-7-2013 16:47  |
| 2549     | Self-harm  | TK5-98   | Suicide - firearms                                           | 1             | 8-7-2013 16:47  |
| 2549     | Self-harm  | TK5-99   | Attempt suicide - firearms                                   | 1             | 8-7-2013 16:47  |
| 2549     | Self-harm  | TK50     | Suicide and selfinflicted injury by handgun                  | 1             | 8-7-2013 16:47  |
| 2549     | Self-harm  | TK51     | Suicide and selfinflicted injury by shotgun                  | 1             | 8-7-2013 16:47  |
| 2549     | Self-harm  | TK52     | Suicide and selfinflicted injury by hunting rifle            | 1             | 8-7-2013 16:47  |

|      |           |         |                                                              |   |                |
|------|-----------|---------|--------------------------------------------------------------|---|----------------|
| 2549 | Self-harm | TK53    | Suicide and selfinflicted injury by military firearms        | 1 | 8-7-2013 16:47 |
| 2549 | Self-harm | TK54    | Suicide and selfinflicted injury by other firearm            | 1 | 8-7-2013 16:47 |
| 2549 | Self-harm | TK55    | Suicide and selfinflicted injury by explosives               | 1 | 8-7-2013 16:47 |
| 2549 | Self-harm | TK5z    | Suicide and selfinflicted injury by firearms/explosives NOS  | 1 | 8-7-2013 16:47 |
| 2549 | Self-harm | TK6     | Suicide and selfinflicted injury by cutting and stabbing     | 1 | 8-7-2013 16:47 |
| 2549 | Self-harm | TK6-98  | Suicide - cut/stab                                           | 1 | 8-7-2013 16:47 |
| 2549 | Self-harm | TK6-99  | Attempt suicide - cut/stab                                   | 1 | 8-7-2013 16:47 |
| 2549 | Self-harm | TK60    | Suicide and selfinflicted injury by cutting                  | 1 | 8-7-2013 16:47 |
| 2549 | Self-harm | TK601   | Self inflicted lacerations to wrist                          | 1 | 8-7-2013 16:47 |
| 2549 | Self-harm | TK601-1 | Slashed wrists self inflicted                                | 1 | 8-7-2013 16:47 |
| 2549 | Self-harm | TK61    | Suicide and selfinflicted injury by stabbing                 | 1 | 8-7-2013 16:47 |
| 2549 | Self-harm | TK6z    | Suicide and selfinflicted injury by cutting and stabbing NOS | 1 | 8-7-2013 16:47 |
| 2549 | Self-harm | TK7     | Suicide and selfinflicted injury by jumping from high place  | 1 | 8-7-2013 16:47 |
| 2549 | Self-harm | TK7-98  | Suicide - jump from high                                     | 1 | 8-7-2013 16:47 |
| 2549 | Self-harm | TK7-99  | Attempt suicide-jump from high                               | 1 | 8-7-2013 16:47 |
| 2549 | Self-harm | TK70    | Suicide+selfinflicted injury-jump from residential premises  | 1 | 8-7-2013 16:47 |
| 2549 | Self-harm | TK71    | Suicide+selfinflicted injury-jump from oth manmade structure | 1 | 8-7-2013 16:47 |
| 2549 | Self-harm | TK72    | Suicide+selfinflicted injury-jump from natural sites         | 1 | 8-7-2013 16:47 |
| 2549 | Self-harm | TK7z    | Suicide+selfinflicted injury-jump from high place NOS        | 1 | 8-7-2013 16:47 |
| 2549 | Self-harm | TKx     | Suicide and selfinflicted injury by other means              | 1 | 8-7-2013 16:47 |
| 2549 | Self-harm | TKx0    | Suicide + selfinflicted injury-jump/lie before moving object | 1 | 8-7-2013 16:47 |
| 2549 | Self-harm | TKx00   | Suicide + selfinflicted injury-jumping before moving object  | 1 | 8-7-2013 16:47 |
| 2549 | Self-harm | TKx01   | Suicide + selfinflicted injury-lying before moving object    | 1 | 8-7-2013 16:47 |
| 2549 | Self-harm | TKx0z   | Suicide + selfinflicted inj-jump/lie before moving obj NOS   | 1 | 8-7-2013 16:47 |
| 2549 | Self-harm | TKx1    | Suicide and selfinflicted injury by burns or fire            | 1 | 8-7-2013 16:47 |
| 2549 | Self-harm | TKx2    | Suicide and selfinflicted injury by scald                    | 1 | 8-7-2013 16:47 |
| 2549 | Self-harm | TKx3    | Suicide and selfinflicted injury by extremes of cold         | 1 | 8-7-2013 16:47 |
| 2549 | Self-harm | TKx4    | Suicide and selfinflicted injury by electrocution            | 1 | 8-7-2013 16:47 |
| 2549 | Self-harm | TKx5    | Suicide and selfinflicted injury by crashing motor vehicle   | 1 | 8-7-2013 16:47 |
| 2549 | Self-harm | TKx6    | Suicide and selfinflicted injury by crashing of aircraft     | 1 | 8-7-2013 16:47 |
| 2549 | Self-harm | TKx7    | Suicide and selfinflicted injury caustic subst, excl poison  | 1 | 8-7-2013 16:47 |
| 2549 | Self-harm | TKxy    | Suicide and selfinflicted injury by other specified means    | 1 | 8-7-2013 16:47 |
| 2549 | Self-harm | TKxz    | Suicide and selfinflicted injury by other means NOS          | 1 | 8-7-2013 16:47 |
| 2549 | Self-harm | TKy     | Late effects of selfinflicted injury                         | 1 | 8-7-2013 16:47 |
| 2549 | Self-harm | TKz     | Suicide and selfinflicted injury NOS                         | 1 | 8-7-2013 16:47 |
| 2549 | Self-harm | TKz-98  | Suicide - NOS                                                | 1 | 8-7-2013 16:47 |
| 2549 | Self-harm | TKz-99  | Attempt suicide - NOS                                        | 1 | 8-7-2013 16:47 |
| 2549 | Self-harm | U2      | [X]Intentional self-harm                                     | 1 | 8-7-2013 16:47 |
| 2549 | Self-harm | U2-1    | [X]Self inflicted injury                                     | 1 | 8-7-2013 16:47 |
| 2549 | Self-harm | U2-2    | [X]Injury - self-inflicted                                   | 1 | 8-7-2013 16:47 |
| 2549 | Self-harm | U2-3    | [X]Suicide                                                   | 1 | 8-7-2013 16:47 |
| 2549 | Self-harm | U2-4    | [X]Attempted suicide                                         | 1 | 8-7-2013 16:47 |
| 2549 | Self-harm | U2-5    | [X]Para-suicide                                              | 1 | 8-7-2013 16:47 |
| 2549 | Self-harm | U20     | [X]Intentional self poisoning/exposure to noxious substances | 1 | 8-7-2013 16:47 |
| 2549 | Self-harm | U20-1   | [X]Deliberate drug overdose / other poisoning                | 1 | 8-7-2013 16:47 |
| 2549 | Self-harm | U200    | [X]Intent self poison/exposure to nonopioid analgesic        | 1 | 8-7-2013 16:47 |
| 2549 | Self-harm | U200-1  | [X]Overdose - paracetamol                                    | 1 | 8-7-2013 16:47 |
| 2549 | Self-harm | U200-2  | [X]Overdose - ibuprofen                                      | 1 | 8-7-2013 16:47 |
| 2549 | Self-harm | U200-3  | [X]Overdose - aspirin                                        | 1 | 8-7-2013 16:47 |
| 2549 | Self-harm | U2000   | [X]Int self poison/exposure to nonopioid analgesic at home   | 1 | 8-7-2013 16:47 |
| 2549 | Self-harm | U2001   | [X]Intent self poison nonopioid analgesic at res institut    | 1 | 8-7-2013 16:47 |
| 2549 | Self-harm | U2002   | [X]Int self poison nonopioid analges school/pub admin area   | 1 | 8-7-2013 16:47 |
| 2549 | Self-harm | U2003   | [X]Int self poison nonopioid analges in sport/athletic area  | 1 | 8-7-2013 16:47 |
| 2549 | Self-harm | U2004   | [X]Intent self pois nonopioid analgesic in street/highway    | 1 | 8-7-2013 16:47 |
| 2549 | Self-harm | U2005   | [X]Intent self pois nonopioid analgesic trade/service area   | 1 | 8-7-2013 16:47 |
| 2549 | Self-harm | U2006   | [X]Int self pois nonopioid analgesic indust/construct area   | 1 | 8-7-2013 16:47 |
| 2549 | Self-harm | U2007   | [X]Int self poison/exposure to nonopioid analgesic on farm   | 1 | 8-7-2013 16:47 |
| 2549 | Self-harm | U200y   | [X]Int self poison nonopioid analgesic other spec place      | 1 | 8-7-2013 16:47 |
| 2549 | Self-harm | U200z   | [X]Intent self poison nonopioid analgesic unspecif place     | 1 | 8-7-2013 16:47 |
| 2549 | Self-harm | U201    | [X]Intent self poison/exposure to antiepileptic              | 1 | 8-7-2013 16:47 |
| 2549 | Self-harm | U2010   | [X]Int self poison/exposure to antiepileptic at home         | 1 | 8-7-2013 16:47 |
| 2549 | Self-harm | U2011   | [X]Intent self poison antiepileptic at res institut          | 1 | 8-7-2013 16:47 |
| 2549 | Self-harm | U2012   | [X]Intent self pois nonopioid analges school/pub admin area  | 1 | 8-7-2013 16:47 |
| 2549 | Self-harm | U2013   | [X]Int self poison antiepileptic in sport/athletic area      | 1 | 8-7-2013 16:47 |
| 2549 | Self-harm | U2014   | [X]Intent self pois antiepileptic in street/highway          | 1 | 8-7-2013 16:47 |
| 2549 | Self-harm | U2015   | [X]Intent self pois antiepileptic trade/service area         | 1 | 8-7-2013 16:47 |
| 2549 | Self-harm | U2016   | [X]Int self poison antiepileptic indust/construct area       | 1 | 8-7-2013 16:47 |
| 2549 | Self-harm | U2017   | [X]Int self poison/exposure to antiepileptic on farm         | 1 | 8-7-2013 16:47 |
| 2549 | Self-harm | U201y   | [X]Intent self poison antiepileptic other spec place         | 1 | 8-7-2013 16:47 |

|      |           |        |                                                             |   |                |
|------|-----------|--------|-------------------------------------------------------------|---|----------------|
| 2549 | Self-harm | U201z  | [X]Intent self poison antiepileptic unspecif place          | 1 | 8-7-2013 16:47 |
| 2549 | Self-harm | U202   | [X]Intent self poison/exposure to sedative hypnotic         | 1 | 8-7-2013 16:47 |
| 2549 | Self-harm | U202-1 | [X]Overdose - sleeping tabs                                 | 1 | 8-7-2013 16:47 |
| 2549 | Self-harm | U202-2 | [X]Overdose - diazepam                                      | 1 | 8-7-2013 16:47 |
| 2549 | Self-harm | U202-3 | [X]Overdose - temazepam                                     | 1 | 8-7-2013 16:47 |
| 2549 | Self-harm | U202-4 | [X]Overdose - flurazepam                                    | 1 | 8-7-2013 16:47 |
| 2549 | Self-harm | U202-5 | [X]Overdose - nitrazepam                                    | 1 | 8-7-2013 16:47 |
| 2549 | Self-harm | U202-6 | [X]Overdose - benzodiazepine                                | 1 | 8-7-2013 16:47 |
| 2549 | Self-harm | U202-7 | [X]Overdose - barbiturate                                   | 1 | 8-7-2013 16:47 |
| 2549 | Self-harm | U202-8 | [X]Overdose - amobarbital                                   | 1 | 8-7-2013 16:47 |
| 2549 | Self-harm | U2020  | [X]Int self poison/exposure to sedative hypnotic at home    | 1 | 8-7-2013 16:47 |
| 2549 | Self-harm | U2021  | [X]Intent self poison sedative hypnotic at res institut     | 1 | 8-7-2013 16:47 |
| 2549 | Self-harm | U2022  | [X]Int self poison sedative hypnotic school/pub admin area  | 1 | 8-7-2013 16:47 |
| 2549 | Self-harm | U2023  | [X]Int self poison sedative hypnotic in sport/athletic area | 1 | 8-7-2013 16:47 |
| 2549 | Self-harm | U2024  | [X]Intent self pois sedative hypnotic in street/highway     | 1 | 8-7-2013 16:47 |
| 2549 | Self-harm | U2025  | [X]Intent self pois sedative hypnotic trade/service area    | 1 | 8-7-2013 16:47 |
| 2549 | Self-harm | U2026  | [X]Int self pois sedative hypnotic indust/construct area    | 1 | 8-7-2013 16:47 |
| 2549 | Self-harm | U2027  | [X]Int self poison/exposure to sedative hypnotic on farm    | 1 | 8-7-2013 16:47 |
| 2549 | Self-harm | U202y  | [X]Int self poison sedative hypnotic other spec place       | 1 | 8-7-2013 16:47 |
| 2549 | Self-harm | U202z  | [X]Intent self poison sedative hypnotic unspecif place      | 1 | 8-7-2013 16:47 |
| 2549 | Self-harm | U203   | [X]Intent self poison/exposure to antiparkinson drug        | 1 | 8-7-2013 16:47 |
| 2549 | Self-harm | U2030  | [X]Int self poison/exposure to antiparkinson drug at home   | 1 | 8-7-2013 16:47 |
| 2549 | Self-harm | U2031  | [X]Intent self poison antiparkinson drug at res institut    | 1 | 8-7-2013 16:47 |
| 2549 | Self-harm | U2032  | [X]Int self poison antparkinson drug school/pub admin area  | 1 | 8-7-2013 16:47 |
| 2549 | Self-harm | U2033  | [X]Int self poison antparkinson drug in sport/athletic area | 1 | 8-7-2013 16:47 |
| 2549 | Self-harm | U2034  | [X]Intent self pois antiparkinson drug in street/highway    | 1 | 8-7-2013 16:47 |
| 2549 | Self-harm | U2035  | [X]Intent self pois antiparkinson drug trade/service area   | 1 | 8-7-2013 16:47 |
| 2549 | Self-harm | U2036  | [X]Int self pois antiparkinson drug indust/construct area   | 1 | 8-7-2013 16:47 |
| 2549 | Self-harm | U2037  | [X]Int self poison/exposure to antiparkinson drug on farm   | 1 | 8-7-2013 16:47 |
| 2549 | Self-harm | U203y  | [X]Int self poison antiparkinson drug other spec place      | 1 | 8-7-2013 16:47 |
| 2549 | Self-harm | U203z  | [X]Intent self poison antiparkinson drug unspecif place     | 1 | 8-7-2013 16:47 |
| 2549 | Self-harm | U204   | [X]Intent self poison/exposure to psychotropic drug         | 1 | 8-7-2013 16:47 |
| 2549 | Self-harm | U204-1 | [X]Overdose - antidepressant                                | 1 | 8-7-2013 16:47 |
| 2549 | Self-harm | U204-2 | [X]Overdose - amitriptyline                                 | 1 | 8-7-2013 16:47 |
| 2549 | Self-harm | U204-3 | [X]Overdose - SSRI                                          | 1 | 8-7-2013 16:47 |
| 2549 | Self-harm | U2040  | [X]Int self poison/exposure to psychotropic drug at home    | 1 | 8-7-2013 16:47 |
| 2549 | Self-harm | U2041  | [X]Intent self poison psychotropic drug at res institut     | 1 | 8-7-2013 16:47 |
| 2549 | Self-harm | U2042  | [X]Int self poison psychotropic drug school/pub admin area  | 1 | 8-7-2013 16:47 |
| 2549 | Self-harm | U2043  | [X]Int self poison psychotropic drug in sport/athletic area | 1 | 8-7-2013 16:47 |
| 2549 | Self-harm | U2044  | [X]Intent self pois psychotropic drug in street/highway     | 1 | 8-7-2013 16:47 |
| 2549 | Self-harm | U2045  | [X]Intent self pois psychotropic drug trade/service area    | 1 | 8-7-2013 16:47 |
| 2549 | Self-harm | U2046  | [X]Int self pois psychotropic drug indust/construct area    | 1 | 8-7-2013 16:47 |
| 2549 | Self-harm | U2047  | [X]Int self poison/exposure to psychotropic drug on farm    | 1 | 8-7-2013 16:47 |
| 2549 | Self-harm | U204y  | [X]Int self poison psychotropic drug other spec place       | 1 | 8-7-2013 16:47 |
| 2549 | Self-harm | U204z  | [X]Intent self poison psychotropic drug unspecif place      | 1 | 8-7-2013 16:47 |
| 2549 | Self-harm | U205   | [X]Intent self poison/exposure to narcotic drug             | 1 | 8-7-2013 16:47 |
| 2549 | Self-harm | U205-1 | [X]Overdose - heroin                                        | 1 | 8-7-2013 16:47 |
| 2549 | Self-harm | U2050  | [X]Int self poison/exposure to narcotic drug at home        | 1 | 8-7-2013 16:47 |
| 2549 | Self-harm | U2051  | [X]Intent self poison narcotic drug at res institut         | 1 | 8-7-2013 16:47 |
| 2549 | Self-harm | U2052  | [X]Int self poison narcotic drug school/pub admin area      | 1 | 8-7-2013 16:47 |
| 2549 | Self-harm | U2053  | [X]Int self poison narcotic drug in sport/athletic area     | 1 | 8-7-2013 16:47 |
| 2549 | Self-harm | U2054  | [X]Intent self pois narcotic drug in street/highway         | 1 | 8-7-2013 16:47 |
| 2549 | Self-harm | U2055  | [X]Intent self pois narcotic drug trade/service area        | 1 | 8-7-2013 16:47 |
| 2549 | Self-harm | U2056  | [X]Int self pois narcotic drug indust/construct area        | 1 | 8-7-2013 16:47 |
| 2549 | Self-harm | U2057  | [X]Int self poison/exposure to narcotic drug on farm        | 1 | 8-7-2013 16:47 |
| 2549 | Self-harm | U205y  | [X]Int self poison narcotic drug other spec place           | 1 | 8-7-2013 16:47 |
| 2549 | Self-harm | U205z  | [X]Intent self poison narcotic drug unspecif place          | 1 | 8-7-2013 16:47 |
| 2549 | Self-harm | U206   | [X]Intent self poison/exposure to hallucinogen              | 1 | 8-7-2013 16:47 |
| 2549 | Self-harm | U2060  | [X]Int self poison/exposure to hallucinogen at home         | 1 | 8-7-2013 16:47 |
| 2549 | Self-harm | U2061  | [X]Intent self poison hallucinogen at res institut          | 1 | 8-7-2013 16:47 |
| 2549 | Self-harm | U2062  | [X]Int self poison hallucinogenschool/pub admin area        | 1 | 8-7-2013 16:47 |
| 2549 | Self-harm | U2063  | [X]Int self poison hallucinogenin sport/athletic area       | 1 | 8-7-2013 16:47 |
| 2549 | Self-harm | U2064  | [X]Intent self pois hallucinogen in street/highway          | 1 | 8-7-2013 16:47 |
| 2549 | Self-harm | U2065  | [X]Intent self pois hallucinogen trade/service area         | 1 | 8-7-2013 16:47 |
| 2549 | Self-harm | U2066  | [X]Int self pois hallucinogen indust/construct area         | 1 | 8-7-2013 16:47 |
| 2549 | Self-harm | U2067  | [X]Int self poison/exposure to hallucinogen on farm         | 1 | 8-7-2013 16:47 |
| 2549 | Self-harm | U206y  | [X]Int self poison hallucinogen other spec place            | 1 | 8-7-2013 16:47 |
| 2549 | Self-harm | U206z  | [X]Intent self poison hallucinogen unspecif place           | 1 | 8-7-2013 16:47 |
| 2549 | Self-harm | U207   | [X]Intent self poison/exposure to oth autonomic drug        | 1 | 8-7-2013 16:47 |

|      |           |        |                                                             |   |                |
|------|-----------|--------|-------------------------------------------------------------|---|----------------|
| 2549 | Self-harm | U2070  | [X]Int self poison/exposure to oth autonomic drug at home   | 1 | 8-7-2013 16:47 |
| 2549 | Self-harm | U2071  | [X]Intent self poison oth autonomic drug at res institut    | 1 | 8-7-2013 16:47 |
| 2549 | Self-harm | U2072  | [X]Int self poison oth autonom drug school/pub admin area   | 1 | 8-7-2013 16:47 |
| 2549 | Self-harm | U2073  | [X]Int self poison oth autonom drug in sport/athletic area  | 1 | 8-7-2013 16:47 |
| 2549 | Self-harm | U2074  | [X]Intent self pois oth autonomic drug in street/highway    | 1 | 8-7-2013 16:47 |
| 2549 | Self-harm | U2075  | [X]Intent self pois oth autonomic drug trade/service area   | 1 | 8-7-2013 16:47 |
| 2549 | Self-harm | U2076  | [X]Int self pois oth autonomic drug indust/construct area   | 1 | 8-7-2013 16:47 |
| 2549 | Self-harm | U2077  | [X]Int self poison/exposure to oth autonomic drug on farm   | 1 | 8-7-2013 16:47 |
| 2549 | Self-harm | U207y  | [X]Int self poison oth autonomic drug other spec place      | 1 | 8-7-2013 16:47 |
| 2549 | Self-harm | U207z  | [X]Intent self poison oth autonomic drug unspecif place     | 1 | 8-7-2013 16:47 |
| 2549 | Self-harm | U208   | [X]Int self poison/exposure to other/unspec drug/medicament | 1 | 8-7-2013 16:47 |
| 2549 | Self-harm | U2080  | [X]Int self poison/exposure to oth/unsp drug/medicam home   | 1 | 8-7-2013 16:47 |
| 2549 | Self-harm | U2081  | [X]Intent self poison oth/unsp drug/medicam res institut    | 1 | 8-7-2013 16:47 |
| 2549 | Self-harm | U2082  | [X]Int self poison oth/uns drug/med school/pub admin area   | 1 | 8-7-2013 16:47 |
| 2549 | Self-harm | U2083  | [X]Int self poison oth/uns drug/med in sport/athletic area  | 1 | 8-7-2013 16:47 |
| 2549 | Self-harm | U2084  | [X]Intent self pois oth/unsp drug/medic in street/highway   | 1 | 8-7-2013 16:47 |
| 2549 | Self-harm | U2085  | [X]Intent self pois oth/unsp drug/medic trade/service area  | 1 | 8-7-2013 16:47 |
| 2549 | Self-harm | U2086  | [X]Int self pois oth/unsp drug/medic indust/construct area  | 1 | 8-7-2013 16:47 |
| 2549 | Self-harm | U2087  | [X]Int self poison/exposure to oth/unsp drug/medic on farm  | 1 | 8-7-2013 16:47 |
| 2549 | Self-harm | U208y  | [X]Int self poison oth/unsp drug/medic other spec place     | 1 | 8-7-2013 16:47 |
| 2549 | Self-harm | U208z  | [X]Intent self poison oth/unsp drug/medic unspecif place    | 1 | 8-7-2013 16:47 |
| 2549 | Self-harm | U209   | [X]Intent self poison/exposure to alcohol                   | 1 | 8-7-2013 16:47 |
| 2549 | Self-harm | U2090  | [X]Int self poison/exposure to alcohol at home              | 1 | 8-7-2013 16:47 |
| 2549 | Self-harm | U2091  | [X]Intent self poison alcohol at res institut               | 1 | 8-7-2013 16:47 |
| 2549 | Self-harm | U2092  | [X]Int self poison alcohol school/pub admin area            | 1 | 8-7-2013 16:47 |
| 2549 | Self-harm | U2093  | [X]Int self poison alcohol in sport/athletic area           | 1 | 8-7-2013 16:47 |
| 2549 | Self-harm | U2094  | [X]Intent self pois alcohol in street/highway               | 1 | 8-7-2013 16:47 |
| 2549 | Self-harm | U2095  | [X]Intent self pois alcohol trade/service area              | 1 | 8-7-2013 16:47 |
| 2549 | Self-harm | U2096  | [X]Int self pois alcohol indust/construct area              | 1 | 8-7-2013 16:47 |
| 2549 | Self-harm | U2097  | [X]Int self poison/exposure to alcohol on farm              | 1 | 8-7-2013 16:47 |
| 2549 | Self-harm | U209y  | [X]Int self poison alcohol other spec place                 | 1 | 8-7-2013 16:47 |
| 2549 | Self-harm | U209z  | [X]Intent self poison alcohol unspecif place                | 1 | 8-7-2013 16:47 |
| 2549 | Self-harm | U20A   | [X]Intentional self poison organ solvent,halogen hydrocarb  | 1 | 8-7-2013 16:47 |
| 2549 | Self-harm | U20A-1 | [X]Self poisoning from glue solvent                         | 1 | 8-7-2013 16:47 |
| 2549 | Self-harm | U20A0  | [X]Int self pois organ solvent,halogen hydrocarb, home      | 1 | 8-7-2013 16:47 |
| 2549 | Self-harm | U20A1  | [X]Int self poison org solvent,halogen hydrocarb,res instit | 1 | 8-7-2013 16:47 |
| 2549 | Self-harm | U20A2  | [X]Int self poison org solvent,halogen hydrocarb, school    | 1 | 8-7-2013 16:47 |
| 2549 | Self-harm | U20A3  | [X]Int self poison org solvent,halogen hydrocarb,sport area | 1 | 8-7-2013 16:47 |
| 2549 | Self-harm | U20A4  | [X]Int self poison org solvent,halogen hydrocarb,in highway | 1 | 8-7-2013 16:47 |
| 2549 | Self-harm | U20A5  | [X]Int self poison org solvent,halogen hydrocarb,trade area | 1 | 8-7-2013 16:47 |
| 2549 | Self-harm | U20A6  | [X]Int self pois org solvent,halogen hydrocarb,indust area  | 1 | 8-7-2013 16:47 |
| 2549 | Self-harm | U20A7  | [X]Int self poison org solvent,halogen hydrocarb,on farm    | 1 | 8-7-2013 16:47 |
| 2549 | Self-harm | U20Ay  | [X]Int self pois org solv,halogen hydrocarb,oth spec place  | 1 | 8-7-2013 16:47 |
| 2549 | Self-harm | U20Az  | [X]Int self pois org solv,halogen hydrocarb, unspec place   | 1 | 8-7-2013 16:47 |
| 2549 | Self-harm | U20B   | [X]Intent self poison/exposure to other gas/vapour          | 1 | 8-7-2013 16:47 |
| 2549 | Self-harm | U20B-1 | [X]Self carbon monoxide poisoning                           | 1 | 8-7-2013 16:47 |
| 2549 | Self-harm | U20B0  | [X]Int self poison/exposure to other gas/vapour at home     | 1 | 8-7-2013 16:47 |
| 2549 | Self-harm | U20B1  | [X]Intent self poison other gas/vapour at res institut      | 1 | 8-7-2013 16:47 |
| 2549 | Self-harm | U20B2  | [X]Int self poison other gas/vapour school/pub admin area   | 1 | 8-7-2013 16:47 |
| 2549 | Self-harm | U20B3  | [X]Int self poison other gas/vapour in sport/athletic area  | 1 | 8-7-2013 16:47 |
| 2549 | Self-harm | U20B4  | [X]Intent self pois other gas/vapour in street/highway      | 1 | 8-7-2013 16:47 |
| 2549 | Self-harm | U20B5  | [X]Intent self pois other gas/vapour trade/service area     | 1 | 8-7-2013 16:47 |
| 2549 | Self-harm | U20B6  | [X]Int self pois other gas/vapour indust/construct area     | 1 | 8-7-2013 16:47 |
| 2549 | Self-harm | U20B7  | [X]Int self poison/exposure to other gas/vapour on farm     | 1 | 8-7-2013 16:47 |
| 2549 | Self-harm | U20By  | [X]Int self poison other gas/vapour other spec place        | 1 | 8-7-2013 16:47 |
| 2549 | Self-harm | U20Bz  | [X]Intent self poison other gas/vapour unspecif place       | 1 | 8-7-2013 16:47 |
| 2549 | Self-harm | U20C   | [X]Intent self poison/exposure to pesticide                 | 1 | 8-7-2013 16:47 |
| 2549 | Self-harm | U20C-1 | [X]Self poisoning with weedkiller                           | 1 | 8-7-2013 16:47 |
| 2549 | Self-harm | U20C-2 | [X]Self poisoning with paraquat                             | 1 | 8-7-2013 16:47 |
| 2549 | Self-harm | U20C0  | [X]Int self poison/exposure to pesticide at home            | 1 | 8-7-2013 16:47 |
| 2549 | Self-harm | U20C1  | [X]Intent self poison pesticide at res institut             | 1 | 8-7-2013 16:47 |
| 2549 | Self-harm | U20C2  | [X]Int self poison pesticide school/pub admin area          | 1 | 8-7-2013 16:47 |
| 2549 | Self-harm | U20C3  | [X]Int self poison pesticide in sport/athletic area         | 1 | 8-7-2013 16:47 |
| 2549 | Self-harm | U20C4  | [X]Intent self pois pesticide in street/highway             | 1 | 8-7-2013 16:47 |
| 2549 | Self-harm | U20C5  | [X]Intent self pois pesticide trade/service area            | 1 | 8-7-2013 16:47 |
| 2549 | Self-harm | U20C6  | [X]Int self pois pesticide indust/construct area            | 1 | 8-7-2013 16:47 |
| 2549 | Self-harm | U20C7  | [X]Int self poison/exposure to pesticide on farm            | 1 | 8-7-2013 16:47 |
| 2549 | Self-harm | U20Cy  | [X]Int self poison pesticide other spec place               | 1 | 8-7-2013 16:47 |
| 2549 | Self-harm | U20Cz  | [X]Intent self poison pesticide unspecif place              | 1 | 8-7-2013 16:47 |

|      |           |       |                                                               |   |                |
|------|-----------|-------|---------------------------------------------------------------|---|----------------|
| 2549 | Self-harm | U20y  | [X]Intent self poison/exposure to unspecif chemical           | 1 | 8-7-2013 16:47 |
| 2549 | Self-harm | U20y0 | [X]Int self poison/exposure to unspecif chemical at home      | 1 | 8-7-2013 16:47 |
| 2549 | Self-harm | U20y1 | [X]Intent self poison unspecif chemical at res institut       | 1 | 8-7-2013 16:47 |
| 2549 | Self-harm | U20y2 | [X]Int self poison unspecif chemical school/pub admin area    | 1 | 8-7-2013 16:47 |
| 2549 | Self-harm | U20y3 | [X]Int self poison unspecif chemical in sport/athletic area   | 1 | 8-7-2013 16:47 |
| 2549 | Self-harm | U20y4 | [X]Intent self pois unspecif chemical in street/highway       | 1 | 8-7-2013 16:47 |
| 2549 | Self-harm | U20y5 | [X]Intent self pois unspecif chemical trade/service area      | 1 | 8-7-2013 16:47 |
| 2549 | Self-harm | U20y6 | [X]Int self pois unspecif chemical indust/construct area      | 1 | 8-7-2013 16:47 |
| 2549 | Self-harm | U20y7 | [X]Int self poison/exposure to unspecif chemical on farm      | 1 | 8-7-2013 16:47 |
| 2549 | Self-harm | U20yy | [X]Int self poison unspecif chemical other spec place         | 1 | 8-7-2013 16:47 |
| 2549 | Self-harm | U20yz | [X]Intent self poison unspecif chemical unspecif place        | 1 | 8-7-2013 16:47 |
| 2549 | Self-harm | U21   | [X]Intent self harm by hanging strangulation / suffocation    | 1 | 8-7-2013 16:47 |
| 2549 | Self-harm | U210  | [X]Intent self harm by hanging strangulat/suffocat occ home   | 1 | 8-7-2013 16:47 |
| 2549 | Self-harm | U211  | [X]Intent self harm by hangng strangult/suffoct resid instit  | 1 | 8-7-2013 16:47 |
| 2549 | Self-harm | U212  | [X]Inten slf harm hang strang/suffc sch oth ins/pub adm area  | 1 | 8-7-2013 16:47 |
| 2549 | Self-harm | U213  | [X]Intent self harm by hang strangl/suffc sport/athlet area   | 1 | 8-7-2013 16:47 |
| 2549 | Self-harm | U214  | [X]Intent self harm by hangng strangult/suffoct street/h'way  | 1 | 8-7-2013 16:47 |
| 2549 | Self-harm | U215  | [X]Intent self harm by hang strangl/suffc trade/service area  | 1 | 8-7-2013 16:47 |
| 2549 | Self-harm | U216  | [X]Intent self harm by hang strangl/suffc indust/constr area  | 1 | 8-7-2013 16:47 |
| 2549 | Self-harm | U217  | [X]Intent self harm by hanging strangulat/suffocat occ farm   | 1 | 8-7-2013 16:47 |
| 2549 | Self-harm | U21y  | [X]Intent self harm by hangng strangul/suffoct oth spec plce  | 1 | 8-7-2013 16:47 |
| 2549 | Self-harm | U21z  | [X]Intent self harm by hangng strangul/suffoct unspecif plce  | 1 | 8-7-2013 16:47 |
| 2549 | Self-harm | U22   | [X]Intentional self harm by drowning and submersion           | 1 | 8-7-2013 16:47 |
| 2549 | Self-harm | U220  | [X]Intent self harm by drowning/submersion occurrn at home    | 1 | 8-7-2013 16:47 |
| 2549 | Self-harm | U221  | [X]Intent self harm by drowning/submersn occ resid instit'n   | 1 | 8-7-2013 16:47 |
| 2549 | Self-harm | U222  | [X]Intent self harm drown/submersn occ sch/ins/pub adm area   | 1 | 8-7-2013 16:47 |
| 2549 | Self-harm | U223  | [X]Intent self harm by drown/submersn occ sport/athlet area   | 1 | 8-7-2013 16:47 |
| 2549 | Self-harm | U224  | [X]Intent self harm by drowning/submersn occ street/highway   | 1 | 8-7-2013 16:47 |
| 2549 | Self-harm | U225  | [X]Intent self harm by drown/submersn occ trade/servce area   | 1 | 8-7-2013 16:47 |
| 2549 | Self-harm | U226  | [X]Intent self harm by drown/submersn occ indust/constr area  | 1 | 8-7-2013 16:47 |
| 2549 | Self-harm | U227  | [X]Intent self harm by drowning/submersion occurrn on farm    | 1 | 8-7-2013 16:47 |
| 2549 | Self-harm | U22y  | [X]Intent self harm by drown/submersn occ oth specif place    | 1 | 8-7-2013 16:47 |
| 2549 | Self-harm | U22z  | [X]Intent self harm by drown/submersn occ unspecified place   | 1 | 8-7-2013 16:47 |
| 2549 | Self-harm | U23   | [X]Intentional self harm by handgun discharge                 | 1 | 8-7-2013 16:47 |
| 2549 | Self-harm | U230  | [X]Intention self harm by handgun discharge occurrn at home   | 1 | 8-7-2013 16:47 |
| 2549 | Self-harm | U231  | [X]Intent self harm by handgun disch occ in resid instit'n    | 1 | 8-7-2013 16:47 |
| 2549 | Self-harm | U232  | [X]Intent self harm h'gun disch occ sch oth ins/pub adm area  | 1 | 8-7-2013 16:47 |
| 2549 | Self-harm | U233  | [X]Intent self harm by handgun disch occ sport/athlet area    | 1 | 8-7-2013 16:47 |
| 2549 | Self-harm | U234  | [X]Intent self harm by handgun disch occ on street/highway    | 1 | 8-7-2013 16:47 |
| 2549 | Self-harm | U235  | [X]Intent self harm by handgun disch occ trade/service area   | 1 | 8-7-2013 16:47 |
| 2549 | Self-harm | U236  | [X]Intent self harm by handgun disch occ indust/constr area   | 1 | 8-7-2013 16:47 |
| 2549 | Self-harm | U237  | [X]Intention self harm by handgun discharge occurrn on farm   | 1 | 8-7-2013 16:47 |
| 2549 | Self-harm | U23y  | [X]Intent self harm by handgun disch occ at oth specif plce   | 1 | 8-7-2013 16:47 |
| 2549 | Self-harm | U23z  | [X]Intent self harm by handgun disch occ at unspecif place    | 1 | 8-7-2013 16:47 |
| 2549 | Self-harm | U24   | [X]Intent self harm by rifle shotgun/larger firearm disch     | 1 | 8-7-2013 16:47 |
| 2549 | Self-harm | U240  | [X]Intent self harm rifl sh'gun/largr firarm disch occ home   | 1 | 8-7-2013 16:47 |
| 2549 | Self-harm | U241  | [X]Int self harm rifl s'gun/lrg frarm disch occ resid instit  | 1 | 8-7-2013 16:47 |
| 2549 | Self-harm | U242  | [X]Int slf hrm rifl s'gun/lrg frarm dis sch/ins/pub adm area  | 1 | 8-7-2013 16:47 |
| 2549 | Self-harm | U243  | [X]Int self harm rifl s'gun/lrg frarm disch sprt/athlet area  | 1 | 8-7-2013 16:47 |
| 2549 | Self-harm | U244  | [X]Int self harm rifl s'gun/lrg frarm disch occ street/h'way  | 1 | 8-7-2013 16:47 |
| 2549 | Self-harm | U245  | [X]Int self harm rifl s'gun/lrg frarm disch trad/servce area  | 1 | 8-7-2013 16:47 |
| 2549 | Self-harm | U246  | [X]Int slf hrm rifl s'gun/lrg frarm disch indust/constr area  | 1 | 8-7-2013 16:47 |
| 2549 | Self-harm | U247  | [X]Intent self harm rifle sh'gun/largr firarm disch occ farm  | 1 | 8-7-2013 16:47 |
| 2549 | Self-harm | U24y  | [X]Int self harm rifl s'gun/lrg frarm disch oth specif place  | 1 | 8-7-2013 16:47 |
| 2549 | Self-harm | U24z  | [X]Int self harm rifl s'gun/lrg frarm disch occ unspec place  | 1 | 8-7-2013 16:47 |
| 2549 | Self-harm | U25   | [X]Intent self harm by other/unspecified firearm discharge    | 1 | 8-7-2013 16:47 |
| 2549 | Self-harm | U250  | [X]Intent self harm oth/unspecif firearm disch occ at home    | 1 | 8-7-2013 16:47 |
| 2549 | Self-harm | U251  | [X]Intent self harm oth/unsp firearm disch occ resid instit   | 1 | 8-7-2013 16:47 |
| 2549 | Self-harm | U252  | [X]Inten self harm oth/uns firearm disch sch/ins/pub adm area | 1 | 8-7-2013 16:47 |
| 2549 | Self-harm | U253  | [X]Inten self harm oth/uns firearm disch occ sprt/athl area   | 1 | 8-7-2013 16:47 |
| 2549 | Self-harm | U254  | [X]Intent self harm oth/unsp firearm disch occ street/h'way   | 1 | 8-7-2013 16:47 |
| 2549 | Self-harm | U255  | [X]Intent self harm oth/uns firearm disch trade/servce area   | 1 | 8-7-2013 16:47 |
| 2549 | Self-harm | U256  | [X]Inten self harm oth/uns firearm disch indust/constr area   | 1 | 8-7-2013 16:47 |
| 2549 | Self-harm | U257  | [X]Intent self harm oth/unspecif firearm disch occ on farm    | 1 | 8-7-2013 16:47 |
| 2549 | Self-harm | U25y  | [X]Intent self harm oth/unsp firearm disch oth specif place   | 1 | 8-7-2013 16:47 |
| 2549 | Self-harm | U25z  | [X]Intent self harm oth/unsp firearm disch occ unspecif plce  | 1 | 8-7-2013 16:47 |
| 2549 | Self-harm | U26   | [X]Intentional self harm by explosive material                | 1 | 8-7-2013 16:47 |
| 2549 | Self-harm | U260  | [X]Intention self harm by explosive material occurrn home     | 1 | 8-7-2013 16:47 |
| 2549 | Self-harm | U261  | [X]Intention self harm by explosiv materl occ resid instit    | 1 | 8-7-2013 16:47 |

|      |           |      |                                                               |   |                |
|------|-----------|------|---------------------------------------------------------------|---|----------------|
| 2549 | Self-harm | U262 | [X]Intent self harm by explosiv materl sch/ins/pub adm area   | 1 | 8-7-2013 16:47 |
| 2549 | Self-harm | U263 | [X]Intent self harm by explosv materl occ sport/athlet area   | 1 | 8-7-2013 16:47 |
| 2549 | Self-harm | U264 | [X]Intention self harm by explosiv materl occ street/highway  | 1 | 8-7-2013 16:47 |
| 2549 | Self-harm | U265 | [X]Intent self harm by explosv materl occ trade/service area  | 1 | 8-7-2013 16:47 |
| 2549 | Self-harm | U266 | [X]Intent self harm by explosv materl occ indust/constr area  | 1 | 8-7-2013 16:47 |
| 2549 | Self-harm | U267 | [X]Intention self harm by explosive material occurrn farm     | 1 | 8-7-2013 16:47 |
| 2549 | Self-harm | U26y | [X]Intent self harm by explosiv materl occ oth specif place   | 1 | 8-7-2013 16:47 |
| 2549 | Self-harm | U26z | [X]Intent self harm by explosiv materl occ unspecif place     | 1 | 8-7-2013 16:47 |
| 2549 | Self-harm | U27  | [X]Intentional self harm by smoke, fire and flames            | 1 | 8-7-2013 16:47 |
| 2549 | Self-harm | U270 | [X]Intention self harm by smoke fire/flames occurrn at home   | 1 | 8-7-2013 16:47 |
| 2549 | Self-harm | U271 | [X]Intent self harm by smoke fire/flame occ resid instit'n    | 1 | 8-7-2013 16:47 |
| 2549 | Self-harm | U272 | [X]Intent self harm by smoke fire/flame sch/ins/pub adm area  | 1 | 8-7-2013 16:47 |
| 2549 | Self-harm | U273 | [X]Intent self harm by smok fire/flam occ sport/athlet area   | 1 | 8-7-2013 16:47 |
| 2549 | Self-harm | U274 | [X]Intent self harm by smoke fire/flame occ street/highway    | 1 | 8-7-2013 16:47 |
| 2549 | Self-harm | U275 | [X]Intent self harm by smok fire/flam occ trade/service area  | 1 | 8-7-2013 16:47 |
| 2549 | Self-harm | U276 | [X]Intent self harm by smok fire/flam occ indust/constr area  | 1 | 8-7-2013 16:47 |
| 2549 | Self-harm | U277 | [X]Intention self harm by smoke fire/flames occurrn on farm   | 1 | 8-7-2013 16:47 |
| 2549 | Self-harm | U27y | [X]Intent self harm by smoke fire/flame occ oth specif plce   | 1 | 8-7-2013 16:47 |
| 2549 | Self-harm | U27z | [X]Intent self harm by smoke fire/flames occ unspecif place   | 1 | 8-7-2013 16:47 |
| 2549 | Self-harm | U28  | [X]Intentional self harm by steam hot vapours / hot objects   | 1 | 8-7-2013 16:47 |
| 2549 | Self-harm | U280 | [X]Intent self harm by steam hot vapour/hot obj occ at home   | 1 | 8-7-2013 16:47 |
| 2549 | Self-harm | U281 | [X]Intent self harm by steam hot vapour/obj occ resid instit  | 1 | 8-7-2013 16:47 |
| 2549 | Self-harm | U282 | [X]Int self harm by steam hot vapor/obj sch/ins/pub adm area  | 1 | 8-7-2013 16:47 |
| 2549 | Self-harm | U283 | [X]Int self harm by steam hot vapour/obj occ sport/athl area  | 1 | 8-7-2013 16:47 |
| 2549 | Self-harm | U284 | [X]Intent self harm by steam hot vapour/obj occ street/h'way  | 1 | 8-7-2013 16:47 |
| 2549 | Self-harm | U285 | [X]Int self harm by steam hot vapour/obj trade/service area   | 1 | 8-7-2013 16:47 |
| 2549 | Self-harm | U286 | [X]Int self harm by steam hot vapour/obj indust/constr area   | 1 | 8-7-2013 16:47 |
| 2549 | Self-harm | U287 | [X]Intent self harm by steam hot vapour/hot obj occ on farm   | 1 | 8-7-2013 16:47 |
| 2549 | Self-harm | U28y | [X]Intent self harm by steam hot vapour/obj oth specif place  | 1 | 8-7-2013 16:47 |
| 2549 | Self-harm | U28z | [X]Intent self harm by steam hot vapour/obj occ unspec place  | 1 | 8-7-2013 16:47 |
| 2549 | Self-harm | U29  | [X]Intentional self harm by sharp object                      | 1 | 8-7-2013 16:47 |
| 2549 | Self-harm | U290 | [X]Intentional self harm by sharp object occurrence at home   | 1 | 8-7-2013 16:47 |
| 2549 | Self-harm | U291 | [X]Intent self harm by sharp object occ resident instit'n     | 1 | 8-7-2013 16:47 |
| 2549 | Self-harm | U292 | [X]Intent self harm sharp obj occ sch oth ins/pub adm area    | 1 | 8-7-2013 16:47 |
| 2549 | Self-harm | U293 | [X]Intent self harm by sharp object occ sports/athlet area    | 1 | 8-7-2013 16:47 |
| 2549 | Self-harm | U294 | [X]Intention self harm by sharp object occ street/highway     | 1 | 8-7-2013 16:47 |
| 2549 | Self-harm | U295 | [X]Intent self harm by sharp object occ trade/service area    | 1 | 8-7-2013 16:47 |
| 2549 | Self-harm | U296 | [X]Intent self harm by sharp object occ indust/constr area    | 1 | 8-7-2013 16:47 |
| 2549 | Self-harm | U297 | [X]Intentional self harm by sharp object occurrence on farm   | 1 | 8-7-2013 16:47 |
| 2549 | Self-harm | U29y | [X]Intention self harm by sharp object occ oth specif place   | 1 | 8-7-2013 16:47 |
| 2549 | Self-harm | U29z | [X]Intentional self harm by sharp object occ unspecif place   | 1 | 8-7-2013 16:47 |
| 2549 | Self-harm | U2A  | [X]Intentional self harm by blunt object                      | 1 | 8-7-2013 16:47 |
| 2549 | Self-harm | U2A0 | [X]Intentional self harm by blunt object occurrence at home   | 1 | 8-7-2013 16:47 |
| 2549 | Self-harm | U2A1 | [X]Intent self harm by blunt object occ resident instit'n     | 1 | 8-7-2013 16:47 |
| 2549 | Self-harm | U2A2 | [X]Intent self harm blunt obj occ sch oth ins/pub adm area    | 1 | 8-7-2013 16:47 |
| 2549 | Self-harm | U2A3 | [X]Intent self harm by blunt object occ sports/athlet area    | 1 | 8-7-2013 16:47 |
| 2549 | Self-harm | U2A4 | [X]Intention self harm by blunt object occ street/highway     | 1 | 8-7-2013 16:47 |
| 2549 | Self-harm | U2A5 | [X]Intent self harm by blunt object occ trade/service area    | 1 | 8-7-2013 16:47 |
| 2549 | Self-harm | U2A6 | [X]Intent self harm by blunt object occ indust/constr area    | 1 | 8-7-2013 16:47 |
| 2549 | Self-harm | U2A7 | [X]Intentional self harm by blunt object occurrence on farm   | 1 | 8-7-2013 16:47 |
| 2549 | Self-harm | U2Ay | [X]Intention self harm by blunt object occ oth specif place   | 1 | 8-7-2013 16:47 |
| 2549 | Self-harm | U2Az | [X]Intentional self harm by blunt object occ unspecif place   | 1 | 8-7-2013 16:47 |
| 2549 | Self-harm | U2B  | [X]Intentional self harm by jumping from a high place         | 1 | 8-7-2013 16:47 |
| 2549 | Self-harm | U2B0 | [X]Intent self harm by jumping from high place occ at home    | 1 | 8-7-2013 16:47 |
| 2549 | Self-harm | U2B1 | [X]Intent self harm by jump from high place occ resid instit  | 1 | 8-7-2013 16:47 |
| 2549 | Self-harm | U2B2 | [X]Int self harm jump fr high place sch oth ins/pub adm area  | 1 | 8-7-2013 16:47 |
| 2549 | Self-harm | U2B3 | [X]Intent self harm by jump from high place sport/athl area   | 1 | 8-7-2013 16:47 |
| 2549 | Self-harm | U2B4 | [X]Intent self harm by jump from high place occ street/h'way  | 1 | 8-7-2013 16:47 |
| 2549 | Self-harm | U2B5 | [X]Intent self harm by jump from high place trad/service area | 1 | 8-7-2013 16:47 |
| 2549 | Self-harm | U2B6 | [X]Int self harm by jump from high place indust/constr area   | 1 | 8-7-2013 16:47 |
| 2549 | Self-harm | U2B7 | [X]Intent self harm by jumping from high place occ on farm    | 1 | 8-7-2013 16:47 |
| 2549 | Self-harm | U2By | [X]Int self harm by jump from high place occ oth specif plce  | 1 | 8-7-2013 16:47 |
| 2549 | Self-harm | U2Bz | [X]Int self harm by jump from high place occ unspecif place   | 1 | 8-7-2013 16:47 |
| 2549 | Self-harm | U2C  | [X]Intent self harm by jumping / lying before moving object   | 1 | 8-7-2013 16:47 |
| 2549 | Self-harm | U2C0 | [X]Intent self harm by jump/lying befor moving obj occ home   | 1 | 8-7-2013 16:47 |
| 2549 | Self-harm | U2C1 | [X]Int self harm jump/lying bef mov obje occ resid instit'n   | 1 | 8-7-2013 16:47 |
| 2549 | Self-harm | U2C2 | [X]Int self harm jump/lying bef mov obj sch/ins/pub adm area  | 1 | 8-7-2013 16:47 |
| 2549 | Self-harm | U2C3 | [X]Int self harm jump/lying bef mov obj occ sprt/athlet area  | 1 | 8-7-2013 16:47 |
| 2549 | Self-harm | U2C4 | [X]Int self harm jump/lying bef mov obje occ street/highway   | 1 | 8-7-2013 16:47 |

|      |           |      |                                                               |   |                |
|------|-----------|------|---------------------------------------------------------------|---|----------------|
| 2549 | Self-harm | U2C5 | [X]Int self harm jump/lying bef mov obj occ trad/service area | 1 | 8-7-2013 16:47 |
| 2549 | Self-harm | U2C6 | [X]Int self harm jump/lying befr mov obj indust/constr area   | 1 | 8-7-2013 16:47 |
| 2549 | Self-harm | U2C7 | [X]Intent self harm by jump/lying befor moving obj occ farm   | 1 | 8-7-2013 16:47 |
| 2549 | Self-harm | U2Cy | [X]Int self harm jump/lying bef mov obje occ oth specif plce  | 1 | 8-7-2013 16:47 |
| 2549 | Self-harm | U2Cz | [X]Int self harm jump/lying bef mov obje occ unspecif place   | 1 | 8-7-2013 16:47 |
| 2549 | Self-harm | U2D  | [X]Intentional self harm by crashing of motor vehicle         | 1 | 8-7-2013 16:47 |
| 2549 | Self-harm | U2D0 | [X]Intent self harm by crash of motor vehicl occurrn at home  | 1 | 8-7-2013 16:47 |
| 2549 | Self-harm | U2D1 | [X]Intent self harm by crash motor vehicl occ resid instit'n  | 1 | 8-7-2013 16:47 |
| 2549 | Self-harm | U2D2 | [X]Int self harm crash motor vehicl occ sch/ins/pub adm area  | 1 | 8-7-2013 16:47 |
| 2549 | Self-harm | U2D3 | [X]Intent self harm by crash motor vehicl occ sprt/athl area  | 1 | 8-7-2013 16:47 |
| 2549 | Self-harm | U2D4 | [X]Intent self harm by crash motor vehicl occ street/highway  | 1 | 8-7-2013 16:47 |
| 2549 | Self-harm | U2D5 | [X]Intent self harm crash motor vehicl occ trade/service area | 1 | 8-7-2013 16:47 |
| 2549 | Self-harm | U2D6 | [X]Intent self harm crash motor vehic occ indust/constr area  | 1 | 8-7-2013 16:47 |
| 2549 | Self-harm | U2D7 | [X]Intent self harm by crash of motor vehicl occurrn on farm  | 1 | 8-7-2013 16:47 |
| 2549 | Self-harm | U2Dy | [X]Intent self harm by crash motor vehic occ oth specif plce  | 1 | 8-7-2013 16:47 |
| 2549 | Self-harm | U2Dz | [X]Intent self harm by crash motor vehic occ unspecif place   | 1 | 8-7-2013 16:47 |
| 2549 | Self-harm | U2E  | [X]Self mutilation                                            | 1 | 8-7-2013 16:47 |
| 2549 | Self-harm | U2y  | [X]Intentional self harm by other specified means             | 1 | 8-7-2013 16:47 |
| 2549 | Self-harm | U2y0 | [X]Intentionl self harm by oth specif means occurrn at home   | 1 | 8-7-2013 16:47 |
| 2549 | Self-harm | U2y1 | [X]Intent self harm by oth specif means occ resid instit'n    | 1 | 8-7-2013 16:47 |
| 2549 | Self-harm | U2y2 | [X]Intent self harm oth specif mean occ sch/ins/pub adm area  | 1 | 8-7-2013 16:47 |
| 2549 | Self-harm | U2y3 | [X]Intent self harm by oth specif means occ sport/athl area   | 1 | 8-7-2013 16:47 |
| 2549 | Self-harm | U2y4 | [X]Intent self harm by oth specif means occ street/highway    | 1 | 8-7-2013 16:47 |
| 2549 | Self-harm | U2y5 | [X]Intent self harm by oth specif means occ trad/service area | 1 | 8-7-2013 16:47 |
| 2549 | Self-harm | U2y6 | [X]Intent self harm oth specif means occ indust/constr area   | 1 | 8-7-2013 16:47 |
| 2549 | Self-harm | U2y7 | [X]Intentionl self harm by oth specif means occurrn on farm   | 1 | 8-7-2013 16:47 |
| 2549 | Self-harm | U2yy | [X]Intent self harm oth specif means occ oth specif place     | 1 | 8-7-2013 16:47 |
| 2549 | Self-harm | U2yz | [X]Intent self harm by oth specif means occ unspecif place    | 1 | 8-7-2013 16:47 |
| 2549 | Self-harm | U2z  | [X]Intentional self harm by unspecified means                 | 1 | 8-7-2013 16:47 |
| 2549 | Self-harm | U2z0 | [X]Intentional self harm by unspecif means occurrn at home    | 1 | 8-7-2013 16:47 |
| 2549 | Self-harm | U2z1 | [X]Intent self harm by unspecif means occurrn resid instit'n  | 1 | 8-7-2013 16:47 |
| 2549 | Self-harm | U2z2 | [X]Intent self harm by unspec mean occ sch/ins/pub adm area   | 1 | 8-7-2013 16:47 |
| 2549 | Self-harm | U2z3 | [X]Intent self harm unspecif means occurrn sport/athlet area  | 1 | 8-7-2013 16:47 |
| 2549 | Self-harm | U2z4 | [X]Intent self harm by unspecif means occurrn street/highway  | 1 | 8-7-2013 16:47 |
| 2549 | Self-harm | U2z5 | [X]Intent self harm unspecif means occurrn trade/service area | 1 | 8-7-2013 16:47 |
| 2549 | Self-harm | U2z6 | [X]Intent self harm unspecif mean occurrn indust/constr area  | 1 | 8-7-2013 16:47 |
| 2549 | Self-harm | U2z7 | [X]Intentional self harm by unspecif means occurrn on farm    | 1 | 8-7-2013 16:47 |
| 2549 | Self-harm | U2zy | [X]Intent self harm by unspecif means occ oth specif place    | 1 | 8-7-2013 16:47 |
| 2549 | Self-harm | U2zz | [X]Intent self harm by unspecif means occ at unspecif place   | 1 | 8-7-2013 16:47 |

| Group Id | Group Name     | ReadTerm | ReadDesc                                             | Group Version | Date Of Version |
|----------|----------------|----------|------------------------------------------------------|---------------|-----------------|
| 2556     | Alcohol misuse | 136K     | Alcohol intake above recommended sensible limits     | 1             | 12-7-2013 15:04 |
| 2556     | Alcohol misuse | 136L     | Alcohol intake within recommended sensible limits    | 1             | 12-7-2013 15:04 |
| 2556     | Alcohol misuse | 136S     | Hazardous alcohol use                                | 1             | 12-7-2013 15:04 |
| 2556     | Alcohol misuse | 136T     | Harmful alcohol use                                  | 1             | 12-7-2013 15:04 |
| 2556     | Alcohol misuse | 136W     | Alcohol misuse                                       | 1             | 12-7-2013 15:04 |
| 2556     | Alcohol misuse | 13ZY     | Disqualified from driving due to excess alcohol      | 1             | 12-7-2013 15:04 |
| 2556     | Alcohol misuse | 8BA8     | Alcohol detoxification                               | 1             | 12-7-2013 15:04 |
| 2556     | Alcohol misuse | 8H35     | Admitted to alcohol detoxification centre            | 1             | 12-7-2013 15:04 |
| 2556     | Alcohol misuse | 8H7p     | Referral to community alcohol team                   | 1             | 12-7-2013 15:04 |
| 2556     | Alcohol misuse | 8HHe     | Referral to community drug and alcohol team          | 1             | 12-7-2013 15:04 |
| 2556     | Alcohol misuse | 8HkG     | Referral to specialist alcohol treatment service     | 1             | 12-7-2013 15:04 |
| 2556     | Alcohol misuse | 8HkJ     | Referral to alcohol brief intervention service       | 1             | 12-7-2013 15:04 |
| 2556     | Alcohol misuse | E014     | Pathological alcohol intoxication                    | 1             | 12-7-2013 15:04 |
| 2556     | Alcohol misuse | E01y0    | Alcohol withdrawal syndrome                          | 1             | 12-7-2013 15:04 |
| 2556     | Alcohol misuse | E23      | Alcohol dependence syndrome                          | 1             | 12-7-2013 15:04 |
| 2556     | Alcohol misuse | E23-2    | Alcohol problem drinking                             | 1             | 12-7-2013 15:04 |
| 2556     | Alcohol misuse | E230-1   | Alcohol dependence with acute alcoholic intoxication | 1             | 12-7-2013 15:04 |
| 2556     | Alcohol misuse | E23z     | Alcohol dependence syndrome NOS                      | 1             | 12-7-2013 15:04 |
| 2556     | Alcohol misuse | E250-4   | Intoxication - alcohol                               | 1             | 12-7-2013 15:04 |
| 2556     | Alcohol misuse | EGTON59  | Alcohol overdose                                     | 1             | 12-7-2013 15:04 |
| 2556     | Alcohol misuse | Eu102-1  | [X]Alcohol addiction                                 | 1             | 12-7-2013 15:04 |



| Group Id | Group Name  | CodeId         | CodeDesc                                                                 | Group Version | Date Of Version |
|----------|-------------|----------------|--------------------------------------------------------------------------|---------------|-----------------|
| 2558     | Varenicline | CHTA23545NEMIS | Champix Tablets 500 micrograms                                           | 1             | 12-7-2013 15:20 |
| 2558     | Varenicline | CHTA23546NEMIS | Champix Tablets 1 mg                                                     | 1             | 12-7-2013 15:20 |
| 2558     | Varenicline | CHTA23548NEMIS | Champix Treatment Initiation Pack Tablets 11 x 500 micrograms, 14 x 1 mg | 1             | 12-7-2013 15:20 |
| 2558     | Varenicline | VATA23541NEMIS | Varenicline Tablets 500 micrograms                                       | 1             | 12-7-2013 15:20 |
| 2558     | Varenicline | VATA23543NEMIS | Varenicline Tablets 1 mg                                                 | 1             | 12-7-2013 15:20 |
| 2558     | Varenicline | VATA23716NEMIS | Varenicline Tablets 1 mg + 500 micrograms (Starter Pack)                 | 1             | 12-7-2013 15:20 |

| Group Id | Group Name | CodeId        | CodeDesc                                   | Group Version | Date Of Version |
|----------|------------|---------------|--------------------------------------------|---------------|-----------------|
| 2559     | Bupropion  | BUTA4575NEMIS | Bupropion Hydrochloride M/R tablets 150 mg | 1             | 12-7-2013 15:23 |
| 2559     | Bupropion  | ZYTA4578NEMIS | Zyban M/R tablets 150 mg                   | 1             | 12-7-2013 15:23 |

| Group Id | Group Name | Codeld         | CodeDesc                                                                                | Group Version | Date Of Version |
|----------|------------|----------------|-----------------------------------------------------------------------------------------|---------------|-----------------|
| 2560     | NRT        | BOTR12692NEMIS | Boots Nicotine Transdermal patches 21 mg/24 hrs                                         | 1             | 12-7-2013 15:29 |
| 2560     | NRT        | BOTR12693NEMIS | Boots Nicotine Transdermal patches 14 mg/24 hrs                                         | 1             | 12-7-2013 15:29 |
| 2560     | NRT        | BOTR12694NEMIS | Boots Nicotine Transdermal patches 7 mg/24 hrs                                          | 1             | 12-7-2013 15:29 |
| 2560     | NRT        | BOTR27045NEMIS | Boots Nicassist Transdermal patches 10 mg/16 hrs                                        | 1             | 12-7-2013 15:29 |
| 2560     | NRT        | BOTR27046NEMIS | Boots Nicassist Transdermal patches 15 mg/16 hrs                                        | 1             | 12-7-2013 15:29 |
| 2560     | NRT        | BOTR27047NEMIS | Boots Nicassist Transdermal patches 5 mg/16 hrs                                         | 1             | 12-7-2013 15:29 |
| 2560     | NRT        | NICH13750NEMIS | Nicotine Chewing gum (mint) Sugar Free 4 mg                                             | 1             | 12-7-2013 15:29 |
| 2560     | NRT        | NICH13751NEMIS | Niquitin Chewing gum (mint) 4 mg                                                        | 1             | 12-7-2013 15:29 |
| 2560     | NRT        | NICH13752NEMIS | Nicotine Chewing gum (mint) Sugar Free 2 mg                                             | 1             | 12-7-2013 15:29 |
| 2560     | NRT        | NICH13753NEMIS | Niquitin Chewing gum (mint) 2 mg                                                        | 1             | 12-7-2013 15:29 |
| 2560     | NRT        | NICH1979       | Nicorette Chewing gum 2 mg                                                              | 1             | 12-7-2013 15:29 |
| 2560     | NRT        | NICH1980       | Nicorette Chewing gum 4 mg                                                              | 1             | 12-7-2013 15:29 |
| 2560     | NRT        | NICH1981       | Nicotine Chewing gum Sugar Free 2 mg                                                    | 1             | 12-7-2013 15:29 |
| 2560     | NRT        | NICH1982       | Nicotine Chewing gum Sugar Free 4 mg                                                    | 1             | 12-7-2013 15:29 |
| 2560     | NRT        | NICH22309NEMIS | Nicotinell Chewing gum Mint, 2 mg                                                       | 1             | 12-7-2013 15:29 |
| 2560     | NRT        | NICH22310NEMIS | Nicotinell Chewing gum Mint, 4 mg                                                       | 1             | 12-7-2013 15:29 |
| 2560     | NRT        | NICH22311NEMIS | Nicotinell Chewing gum Fruit, 2 mg                                                      | 1             | 12-7-2013 15:29 |
| 2560     | NRT        | NICH22312NEMIS | Nicotinell Chewing gum Fruit, 4 mg                                                      | 1             | 12-7-2013 15:29 |
| 2560     | NRT        | NICH22313NEMIS | Nicotinell Chewing gum Liquorice, 2 mg                                                  | 1             | 12-7-2013 15:29 |
| 2560     | NRT        | NICH22314NEMIS | Nicotinell Chewing gum Liquorice, 4 mg                                                  | 1             | 12-7-2013 15:29 |
| 2560     | NRT        | NICH22316NEMIS | Nicotinell Classic Chewing gum 2 mg                                                     | 1             | 12-7-2013 15:29 |
| 2560     | NRT        | NICH22317NEMIS | Nicotinell Classic Chewing gum 4 mg                                                     | 1             | 12-7-2013 15:29 |
| 2560     | NRT        | NICH22968NEMIS | Nicorette Chewing gum Freshmint, 2 mg                                                   | 1             | 12-7-2013 15:29 |
| 2560     | NRT        | NICH22969NEMIS | Nicorette Chewing gum Freshmint, 4 mg                                                   | 1             | 12-7-2013 15:29 |
| 2560     | NRT        | NICH26048NEMIS | Nicorette Chewing gum Mint, 2 mg                                                        | 1             | 12-7-2013 15:29 |
| 2560     | NRT        | NICH26049NEMIS | Nicorette Chewing gum Mint, 4 mg                                                        | 1             | 12-7-2013 15:29 |
| 2560     | NRT        | NICH26050NEMIS | Nicorette Chewing gum Freshfruit, 2 mg                                                  | 1             | 12-7-2013 15:29 |
| 2560     | NRT        | NICH26051NEMIS | Nicorette Chewing gum Freshfruit, 4 mg                                                  | 1             | 12-7-2013 15:29 |
| 2560     | NRT        | NICH29867NEMIS | Nicorette Chewing gum Cinnamint, 2 mg                                                   | 1             | 12-7-2013 15:29 |
| 2560     | NRT        | NICH29868NEMIS | Nicorette Chewing gum Cinnamint, 4 mg                                                   | 1             | 12-7-2013 15:29 |
| 2560     | NRT        | NICH35200NEMIS | Nicorette Chewing gum Icy White, 2 mg                                                   | 1             | 12-7-2013 15:29 |
| 2560     | NRT        | NICH35201NEMIS | Nicorette Chewing gum Icy White, 4 mg                                                   | 1             | 12-7-2013 15:29 |
| 2560     | NRT        | NICH36798NEMIS | Nicorette Chewing gum Original, 2 mg                                                    | 1             | 12-7-2013 15:29 |
| 2560     | NRT        | NICH36799NEMIS | Nicorette Chewing gum Original, 4 mg                                                    | 1             | 12-7-2013 15:29 |
| 2560     | NRT        | NICH51567NEMIS | Nicotinell Chewing gum Icemint, 4 mg                                                    | 1             | 12-7-2013 15:29 |
| 2560     | NRT        | NICH51617NEMIS | Nicotinell Chewing gum Icemint, 2 mg                                                    | 1             | 12-7-2013 15:29 |
| 2560     | NRT        | NICH6527NEMIS  | Nicotinell Chewing gum 2 mg                                                             | 1             | 12-7-2013 15:29 |
| 2560     | NRT        | NICH6528NEMIS  | Nicotinell Chewing gum 4 mg                                                             | 1             | 12-7-2013 15:29 |
| 2560     | NRT        | NIIN31801EMIS  | Nicorette Inhalator Inhalation cartridge with mouthpiece (refill) 10 mg/cartridge       | 1             | 12-7-2013 15:29 |
| 2560     | NRT        | NIIN31803EMIS  | Nicotine Inhalation cartridge with mouthpiece (refill) 10 mg/cartridge                  | 1             | 12-7-2013 15:29 |
| 2560     | NRT        | NIIN35NEMIS    | Nicorette Inhalator Inhalation cartridge with mouthpiece (starter pack) 10 mg/cartridge | 1             | 12-7-2013 15:29 |
| 2560     | NRT        | NIIN36457NEMIS | Nicotine Inhalation cartridge with mouthpiece 10 mg/cartridge                           | 1             | 12-7-2013 15:29 |
| 2560     | NRT        | NIIN36458NEMIS | Nicorette Inhalator Inhalation cartridge with mouthpiece 10 mg/cartridge                | 1             | 12-7-2013 15:29 |
| 2560     | NRT        | NIIN36NEMIS    | Nicotine Inhalation cartridge with mouthpiece (starter pack) 10 mg/cartridge            | 1             | 12-7-2013 15:29 |
| 2560     | NRT        | NIIN51744NEMIS | Nicorette Inhalator Inhalation cartridge with mouthpiece 15 mg/cartridge                | 1             | 12-7-2013 15:29 |
| 2560     | NRT        | NIIN51745NEMIS | Nicotine Inhalation cartridge with mouthpiece 15 mg/cartridge                           | 1             | 12-7-2013 15:29 |
| 2560     | NRT        | NILO11829NEMIS | Nicotine Lozenges Sugar Free 2 mg                                                       | 1             | 12-7-2013 15:29 |
| 2560     | NRT        | NILO11830NEMIS | Nicotine Lozenges Sugar Free 4 mg                                                       | 1             | 12-7-2013 15:29 |
| 2560     | NRT        | NILO11831NEMIS | Niquitin Lozenges 2 mg                                                                  | 1             | 12-7-2013 15:29 |
| 2560     | NRT        | NILO11832NEMIS | Niquitin Lozenges 4 mg                                                                  | 1             | 12-7-2013 15:29 |
| 2560     | NRT        | NILO16210NEMIS | Niquitin Lozenges (Mint) 2 mg                                                           | 1             | 12-7-2013 15:29 |
| 2560     | NRT        | NILO16211NEMIS | Nicotine Lozenges (Mint) Sugar Free 2 mg                                                | 1             | 12-7-2013 15:29 |
| 2560     | NRT        | NILO16212NEMIS | Nicotine Lozenges (Mint) Sugar Free 4 mg                                                | 1             | 12-7-2013 15:29 |
| 2560     | NRT        | NILO16214NEMIS | Niquitin Lozenges (Mint) 4 mg                                                           | 1             | 12-7-2013 15:29 |
| 2560     | NRT        | NILO26071NEMIS | Nicotine Lozenges Sugar Free 1 mg                                                       | 1             | 12-7-2013 15:29 |
| 2560     | NRT        | NILO26072NEMIS | Nicotinell Lozenges (Mint) 2 mg                                                         | 1             | 12-7-2013 15:29 |
| 2560     | NRT        | NILO28884NEMIS | Nicopass Lozenges (Liquorice Mint) 1.5 mg                                               | 1             | 12-7-2013 15:29 |
| 2560     | NRT        | NILO28885NEMIS | Nicopass Lozenges (Fresh Mint) 1.5 mg                                                   | 1             | 12-7-2013 15:29 |
| 2560     | NRT        | NILO30809NEMIS | Niquitin Lozenges (Menthol Mint) 2 mg                                                   | 1             | 12-7-2013 15:29 |
| 2560     | NRT        | NILO33494NEMIS | Niquitin Pre-Quit Lozenges (Mint) 4 mg                                                  | 1             | 12-7-2013 15:29 |
| 2560     | NRT        | NILO34631NEMIS | Niquitin Lozenges (Menthol Mint) 4 mg                                                   | 1             | 12-7-2013 15:29 |
| 2560     | NRT        | NILO35202NEMIS | Nicotine Lozenges Sugar Free 1.5 mg                                                     | 1             | 12-7-2013 15:29 |
| 2560     | NRT        | NILO38736NEMIS | Niquitin Minis Lozenges (Mint) 1.5 mg                                                   | 1             | 12-7-2013 15:29 |
| 2560     | NRT        | NILO38737NEMIS | Niquitin Minis Lozenges (Mint) 4 mg                                                     | 1             | 12-7-2013 15:29 |
| 2560     | NRT        | NILO45673NEMIS | Nicotine Bitartrate Lozenges (Sugar Free) 1 mg                                          | 1             | 12-7-2013 15:29 |
| 2560     | NRT        | NILO45675NEMIS | Nicotine Bitartrate Lozenges (Sugar Free) 2 mg                                          | 1             | 12-7-2013 15:29 |
| 2560     | NRT        | NILO47262NEMIS | Niquitin Minis Lozenges (Cherry) 1.5 mg                                                 | 1             | 12-7-2013 15:29 |
| 2560     | NRT        | NILO48191NEMIS | Nicorette Lozenges (Fresh Mint) 2 mg                                                    | 1             | 12-7-2013 15:29 |
| 2560     | NRT        | NILO6529NEMIS  | Nicotinell Lozenges (Mint) 1 mg                                                         | 1             | 12-7-2013 15:29 |
| 2560     | NRT        | NILO6530NEMIS  | Nicotine Lozenges (Mint) Sugar Free 1 mg                                                | 1             | 12-7-2013 15:29 |
| 2560     | NRT        | NILO76080NEMIS | Nicorette Cools Lozenges 2 mg                                                           | 1             | 12-7-2013 15:29 |
| 2560     | NRT        | NILO76081NEMIS | Nicorette Cools Lozenges 4 mg                                                           | 1             | 12-7-2013 15:29 |
| 2560     | NRT        | NINA10841NEMIS | Nicotine Nasal spray 500 micrograms/dose                                                | 1             | 12-7-2013 15:29 |
| 2560     | NRT        | NINA25813EMIS  | Nicorette Nasal spray 500 micrograms/dose                                               | 1             | 12-7-2013 15:29 |
| 2560     | NRT        | NIOR48188NEMIS | Nicotine Oromucosal Spray Sugar Free 1 mg/dose                                          | 1             | 12-7-2013 15:29 |
| 2560     | NRT        | NIOR48190NEMIS | Nicorette Quickmist Oromucosal Spray 1 mg/dose                                          | 1             | 12-7-2013 15:29 |
| 2560     | NRT        | NIPA20474EMIS  | Nicotinell Tts 10 Transdermal patches 17.5 mg (7 mg/24 hours)                           | 1             | 12-7-2013 15:29 |
| 2560     | NRT        | NIPA20476EMIS  | Nicotinell Tts 20 Transdermal patches 35 mg (14 mg/24 hours)                            | 1             | 12-7-2013 15:29 |
| 2560     | NRT        | NIPA20478EMIS  | Nicotinell Tts 30 Transdermal patches 52.5 mg (21 mg/24 hours)                          | 1             | 12-7-2013 15:29 |
| 2560     | NRT        | NISU2914NEMIS  | Nicorette Microtab Sublingual tablets 2 mg                                              | 1             | 12-7-2013 15:29 |
| 2560     | NRT        | NISU2915NEMIS  | Nicotine Sublingual tablets Sugar Free 2 mg                                             | 1             | 12-7-2013 15:29 |
| 2560     | NRT        | NITR12771NEMIS | Niquitin Clear Transdermal patches 7 mg/24 hrs                                          | 1             | 12-7-2013 15:29 |
| 2560     | NRT        | NITR12772NEMIS | Niquitin Clear Transdermal patches 14 mg/24 hrs                                         | 1             | 12-7-2013 15:29 |
| 2560     | NRT        | NITR12773NEMIS | Niquitin Clear Transdermal patches 21 mg/24 hrs                                         | 1             | 12-7-2013 15:29 |
| 2560     | NRT        | NITR22497EMIS  | Nicorette Transdermal patches 10 mg/16 hrs                                              | 1             | 12-7-2013 15:29 |
| 2560     | NRT        | NITR22498EMIS  | Nicorette Transdermal patches 15 mg/16 hrs                                              | 1             | 12-7-2013 15:29 |
| 2560     | NRT        | NITR22499EMIS  | Nicorette Transdermal patches 5 mg/16 hrs                                               | 1             | 12-7-2013 15:29 |
| 2560     | NRT        | NITR22503EMIS  | Nicabate Transdermal patches 14 mg                                                      | 1             | 12-7-2013 15:29 |

|          |                |                                                          |   |                 |
|----------|----------------|----------------------------------------------------------|---|-----------------|
| 2560 NRT | NITR22504EMIS  | Nicabate Transdermal patches 21 mg                       | 1 | 12-7-2013 15:29 |
| 2560 NRT | NITR22505EMIS  | Nicabate Transdermal patches 7 mg                        | 1 | 12-7-2013 15:29 |
| 2560 NRT | NITR24013EMIS  | Niconil Transdermal patches 11 mg/24 hrs                 | 1 | 12-7-2013 15:29 |
| 2560 NRT | NITR24014EMIS  | Niconil Transdermal patches 22 mg/24 hrs                 | 1 | 12-7-2013 15:29 |
| 2560 NRT | NITR26376NEMIS | Nicopatch Transdermal patches 7 mg/24 hrs                | 1 | 12-7-2013 15:29 |
| 2560 NRT | NITR26377NEMIS | Nicopatch Transdermal patches 14 mg/24 hrs               | 1 | 12-7-2013 15:29 |
| 2560 NRT | NITR26378NEMIS | Nicopatch Transdermal patches 21 mg/24 hrs               | 1 | 12-7-2013 15:29 |
| 2560 NRT | NITR33504NEMIS | Nicotine Transdermal patches 25 mg/16 hrs                | 1 | 12-7-2013 15:29 |
| 2560 NRT | NITR33509NEMIS | Nicorette Invisi Transdermal patches 10 mg/16 hours      | 1 | 12-7-2013 15:29 |
| 2560 NRT | NITR33510NEMIS | Nicorette Invisi Transdermal patches 15 mg/16 hours      | 1 | 12-7-2013 15:29 |
| 2560 NRT | NITR33511NEMIS | Nicorette Invisi Transdermal patches 25 mg/16 hours      | 1 | 12-7-2013 15:29 |
| 2560 NRT | NITR34938EMIS  | Niquitin Transdermal patches 14 mg/24 hrs                | 1 | 12-7-2013 15:29 |
| 2560 NRT | NITR34939EMIS  | Niquitin Transdermal patches 21 mg/24 hrs                | 1 | 12-7-2013 15:29 |
| 2560 NRT | NITR34940EMIS  | Niquitin Transdermal patches 7 mg/24 hrs                 | 1 | 12-7-2013 15:29 |
| 2560 NRT | NITR34944EMIS  | Nicotine Transdermal patches 14 mg/24 hrs                | 1 | 12-7-2013 15:29 |
| 2560 NRT | NITR34945EMIS  | Nicotine Transdermal patches 21 mg/24 hrs                | 1 | 12-7-2013 15:29 |
| 2560 NRT | NITR34946EMIS  | Nicotine Transdermal patches 7 mg/24 hrs                 | 1 | 12-7-2013 15:29 |
| 2560 NRT | NITR34950EMIS  | Nicotine Transdermal patches 10 mg/16 hrs                | 1 | 12-7-2013 15:29 |
| 2560 NRT | NITR34951EMIS  | Nicotine Transdermal patches 15 mg/16 hrs                | 1 | 12-7-2013 15:29 |
| 2560 NRT | NITR34952EMIS  | Nicotine Transdermal patches 5 mg/16 hrs                 | 1 | 12-7-2013 15:29 |
| 2560 NRT | NITR40307NEMIS | Nicorette Combi Transdermal Patches And Gum 15 mg + 2 mg | 1 | 12-7-2013 15:29 |
| 2560 NRT | NITR78090NEMIS | Niquitin Pre-Quit Clear Transdermal patches 21 mg/24 hrs | 1 | 12-7-2013 15:29 |
